# Supplementary material for: A genome-phenome association study in native microbiomes identifies a mechanism for cytosine modification in DNA and RNA
Source: eLife journal article supplement (doi:10.7554/elife.70021), 2021-11-08
Supplement: supp [file elife-70021-supp-v1.zip]

Archive with 12 entries (12 files):
- elife_poa_e70021_Figure_1_figure_supplement_1.pdf
- elife_poa_e70021_Figure_3_figure_supplement_1.pdf
- elife_poa_e70021_Figure_4_figure_supplement_1.pdf
- elife_poa_e70021_Figure_4_figure_supplement_2.pdf
- elife_poa_e70021_Figure_5_figure_supplement_1.pdf
- elife_poa_e70021_Figure_6_figure_supplement_1.pdf
- elife_poa_e70021_Figure_6=figure_supplement_2.pdf
- elife_poa_e70021_Figure_6_figure_supplement_3.pdf
- elife_poa_e70021_Source_data_1.zip
- elife_poa_e70021_Transparent_Reporting_File.pdf
- elife_poa_e70021_Supplementary_file_1.xlsx
- elife_poa_e70021_Supplementary_file_2.xlsx
