# Supplementary material for: A genome-phenome association study in native microbiomes identifies a mechanism for cytosine modification in DNA and RNA
Source: eLife journal article supplement (doi:10.7554/elife.70021), 2021-11-08
Supplement: supp [file elife-70021-supp-v1.zip › elife_poa_e70021_Figure_3_figure_supplement_1.pdf]

Figure 3 - figure supplement 1

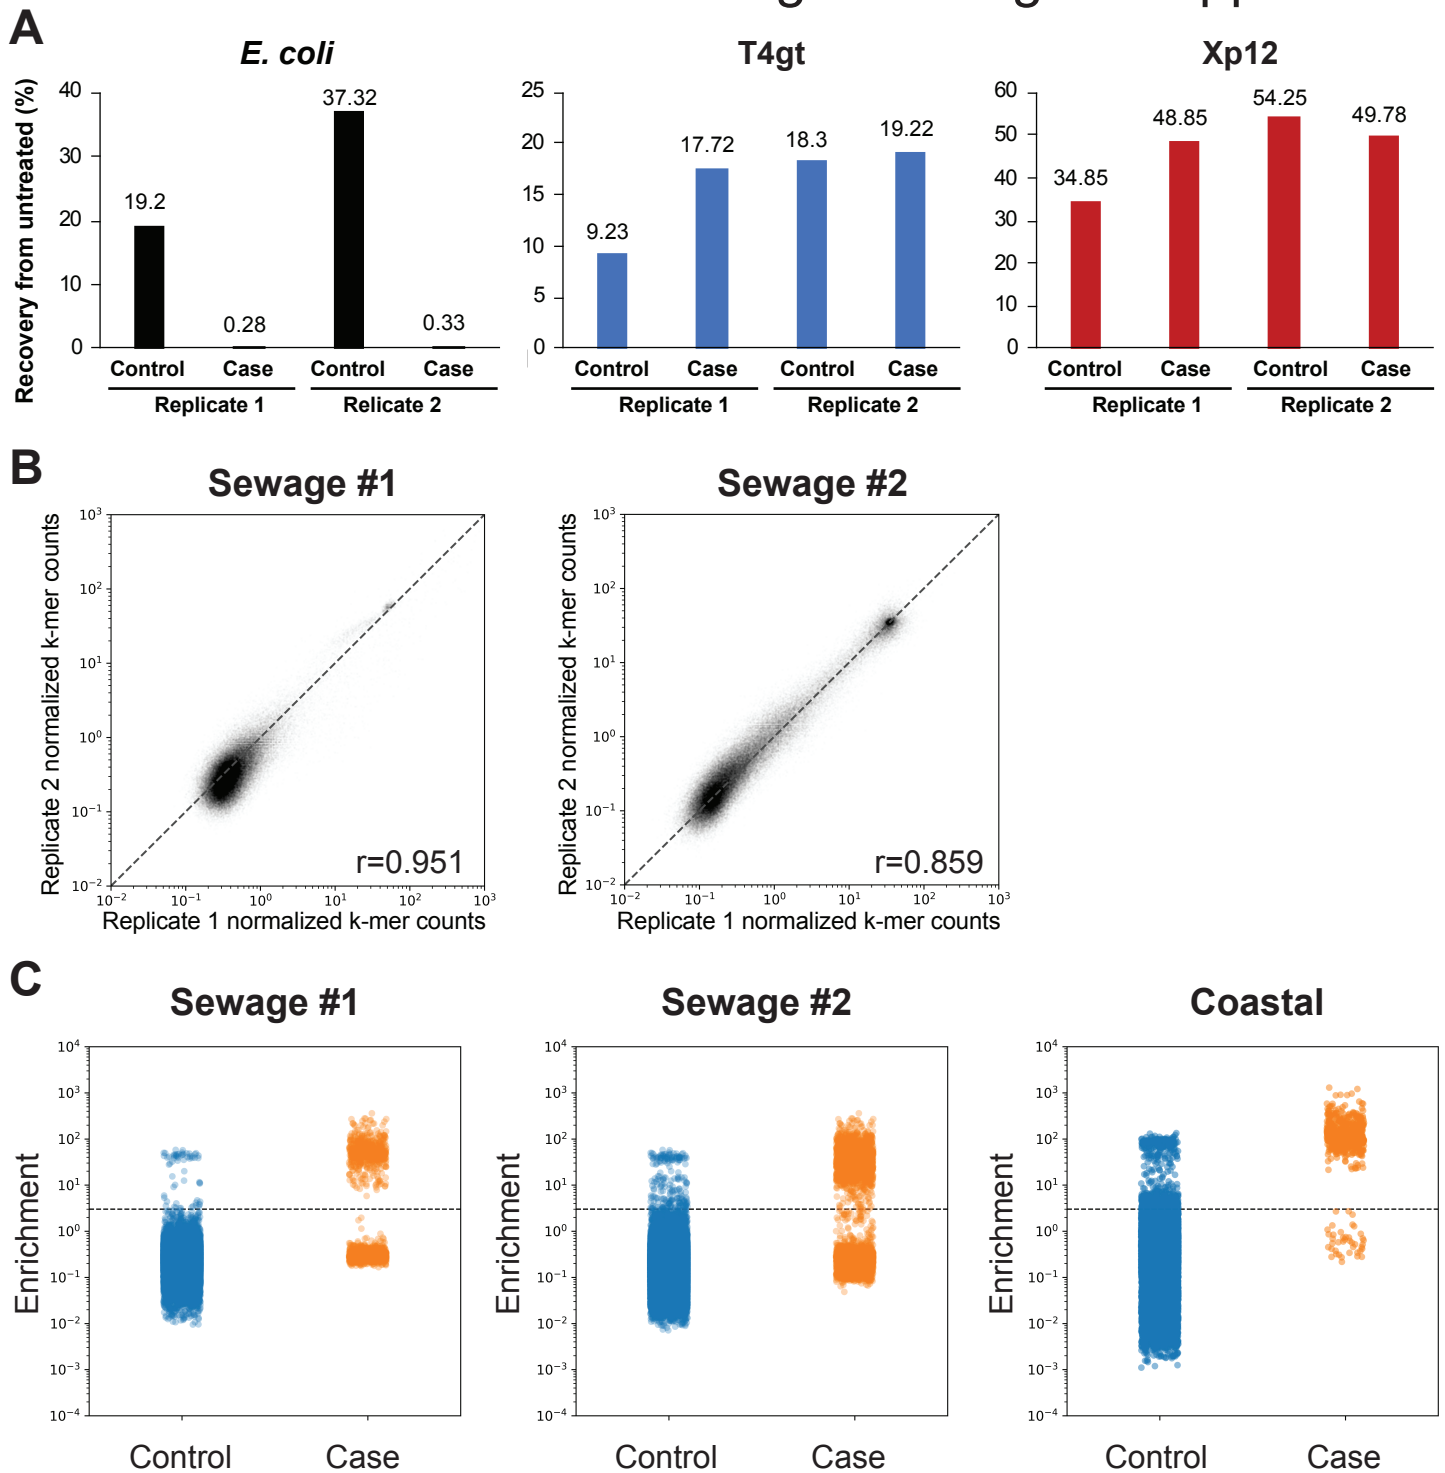

**D**

| Experiment | Modified contigs (>1000bp) | Unmodified contigs (>1000bp) |
|------------|----------------------------|------------------------------|
| Sewage_1   | 660                        | 72587                        |
| Sewage_2   | 1905                       | 81986                        |
| Ocean      | 1336                       | 35802                        |
| Total      | 3901                       | 190375                       |
