# Supplementary material for: A genome-phenome association study in native microbiomes identifies a mechanism for cytosine modification in DNA and RNA
Source: eLife journal article supplement (doi:10.7554/elife.70021), 2021-11-08
Supplement: supp [file elife-70021-supp-v1.zip › elife_poa_e70021_Figure_4_figure_supplement_2.pdf]

# Figure 4 - figure supplement 2

## A Carbam\_trans\_N neighbor pfams

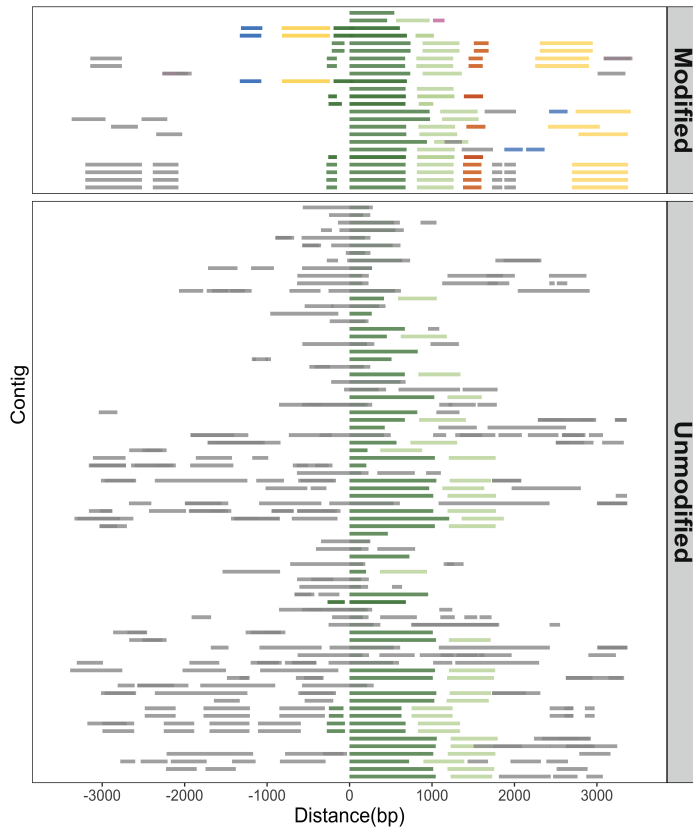

pfam

- Carbam\_trans\_C
- Carbam\_trans\_N
- dCMP\_cyt\_deam\_1
- DUF5664
- others
- PRA-PH
- Thymidylat\_synt

## B Thymidylat\_synt neighbor pfams

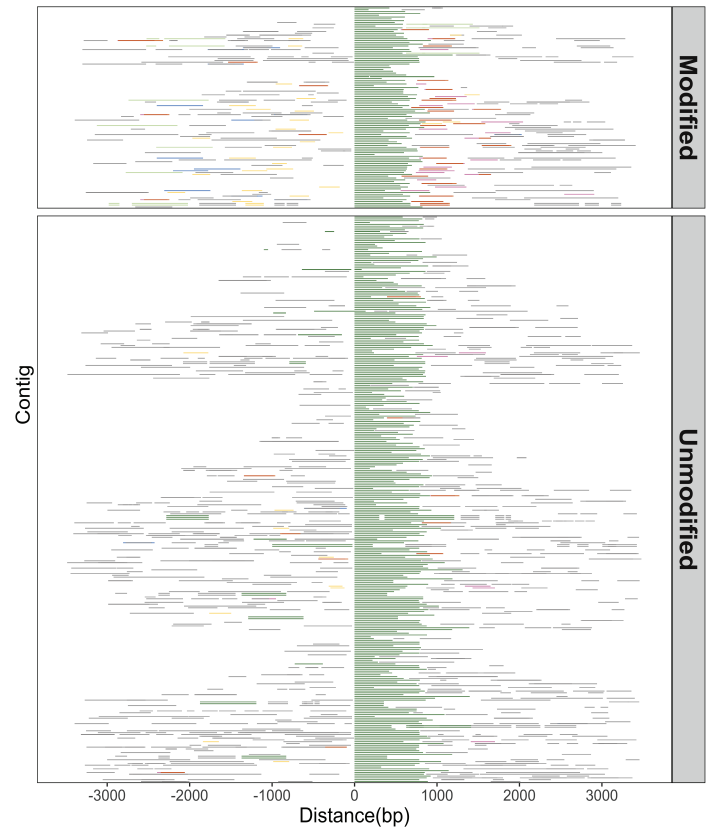

pfam

- Carbam\_trans\_N
- dCMP\_cyt\_deam\_1
- MafB19-deam
- Methyltransf\_23
- others
- PRA-PH
- Thymidylat\_synt

## C PRA-PH neighbor pfams

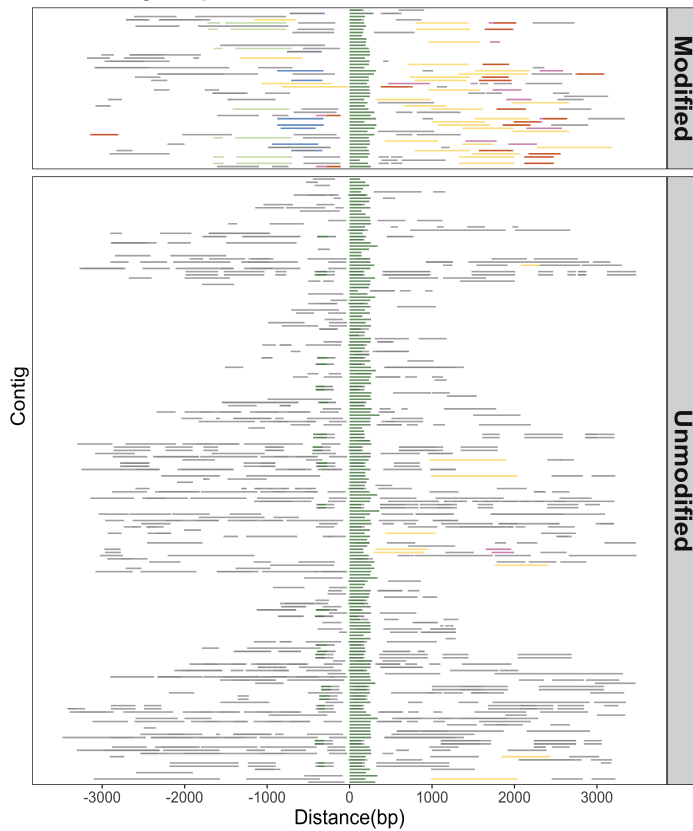

pfam

- Carbam\_trans\_N
- dCMP\_cyt\_deam\_1
- MafB19-deam
- Methyltransf\_23
- others
- PRA-PH
- Thymidylat\_synt
