# Supplementary material for: A genome-phenome association study in native microbiomes identifies a mechanism for cytosine modification in DNA and RNA
Source: eLife journal article supplement (doi:10.7554/elife.70021), 2021-11-08
Supplement: supp [file elife-70021-supp-v1.zip › elife_poa_e70021_Supplementary_file_1.xlsx]

## Sheet: Supplementary_table1
Supplementary Table 1 Amounts of DNA used for enzymatic selection sensitivity test
Molarity Ratio	Modified DNA (ng)	Total DNA (ng)
1904-01-01 01:03:00	8.639	250
1904-01-01 01:10:00	1.127	250
0.111111	0.093	250
0.736111	0.009	250
