# Supplementary material for: A genome-phenome association study in native microbiomes identifies a mechanism for cytosine modification in DNA and RNA
Source: eLife journal article supplement (doi:10.7554/elife.70021), 2021-11-08
Supplement: supp [file elife-70021-supp-v1.zip › elife_poa_e70021_Supplementary_file_2.xlsx]

## Sheet: Supplementary_table2
Supplementary Table 2 Pfam associations with DNA modification
pfam	counts_selected_contigs	counts_unselected_contigs	p_value	Enriched/depleted in selected contigs	corrected_p_value
Thymidylat_synt [M=270]	109	303	2.89e-116	enriched	2.68e-112
dCMP_cyt_deam_1 [M=101]	99	429	1.12e-89	enriched	1.04e-85
MafB19-deam [M=138]	75	305	4.43e-70	enriched	4.11e-66
DNA_ligase_OB_2 [M=66]	47	99	1.32e-55	enriched	1.23e-51
DNA_ligase_A_M [M=204]	53	192	3e-52	enriched	2.78e-48
PRA-PH [M=83]	50	179	1.34e-49	enriched	1.24e-45
DNA_pol_A [M=377]	78	721	6.4e-49	enriched	5.93e-45
DUF285 [M=121]	32	52	3.78e-41	enriched	3.5e-37
Thy1 [M=190]	49	275	1.81e-40	enriched	1.68e-36
NUMOD3 [M=37]	29	93	1.36e-30	enriched	1.26e-26
DNA_pol_B [M=459]	27	82	4.05e-29	enriched	3.76e-25
DUF5051 [M=166]	33	179	3.39e-28	enriched	3.14e-24
Terminase_6 [M=215]	55	740	2e-27	enriched	1.86e-23
Metallophos [M=205]	57	839	1.55e-26	enriched	1.44e-22
Peptidase_S77 [M=185]	23	60	2.82e-26	enriched	2.61e-22
Carbam_trans_C [M=170]	19	33	1.3e-24	enriched	1.2e-20
PDDEXK_1 [M=255]	41	491	1.41e-22	enriched	1.3e-18
Peptidase_S80 [M=503]	19	50	6.63e-22	enriched	6.15e-18
Carbam_trans_N [M=338]	20	73	1.26e-20	enriched	1.17e-16
dUTPase [M=129]	33	340	2.67e-20	enriched	2.47e-16
SNF2_N [M=350]	41	582	4.57e-20	enriched	4.24e-16
RNA_ligase [M=163]	26	196	2.42e-19	enriched	2.24e-15
DUF5664 [M=99]	24	157	3.02e-19	enriched	2.8e-15
Helicase_C [M=111]	70	1830	9.31e-19	enriched	8.63e-15
Gp23 [M=509]	17	59	4.61e-18	enriched	4.27e-14
Ribonuc_red_lgC [M=527]	36	514	9.74e-18	enriched	9.03e-14
gp32 [M=208]	15	41	2.15e-17	enriched	1.99e-13
DUF3854 [M=130]	13	23	3.34e-17	enriched	3.1e-13
5_3_exonuc_N [M=159]	28	302	5.47e-17	enriched	5.07e-13
Intein_splicing [M=155]	25	227	6.35e-17	enriched	5.88e-13
Phage_sheath_1C [M=104]	18	92	1.81e-16	enriched	1.68e-12
ResIII [M=171]	61	1693	1.97e-15	enriched	1.83e-11
UvsY [M=129]	11	18	4.82e-15	enriched	4.47e-11
DUF4815 [M=570]	12	28	7.38e-15	enriched	6.84e-11
AAA_28 [M=163]	21	188	1.44e-14	enriched	1.33e-10
Phage_tube_2 [M=270]	22	217	2.12e-14	enriched	1.97e-10
dUTPase_2 [M=161]	11	23	3.8e-14	enriched	3.52e-10
RecA [M=263]	25	323	1.1e-13	enriched	1.02e-09
Nuc_deoxyri_tr2 [M=108]	12	39	1.88e-13	enriched	1.75e-09
T4-gp15_tss [M=234]	11	28	2.12e-13	enriched	1.97e-09
DUF2800 [M=363]	18	148	2.86e-13	enriched	2.65e-09
DUF4128 [M=128]	16	107	3.41e-13	enriched	3.16e-09
Terminase_6C [M=153]	29	497	9.97e-13	enriched	9.24e-09
Translat_reg [M=121]	9	14	1.08e-12	enriched	1e-08
DUF2815 [M=173]	15	98	1.37e-12	enriched	1.27e-08
Prim-Pol [M=158]	18	168	2.02e-12	enriched	1.88e-08
DUF2828 [M=633]	10	28	5.73e-12	enriched	5.31e-08
DUF932 [M=228]	16	132	6.15e-12	enriched	5.7e-08
GPW_gp25 [M=95]	14	92	8.14e-12	enriched	7.55e-08
DNA_pol_A_exo1 [M=176]	23	335	1.01e-11	enriched	9.34e-08
Phage_base_V [M=75]	13	77	1.41e-11	enriched	1.3e-07
DEAD [M=176]	47	1382	1.96e-11	enriched	1.81e-07
Metallophos_2 [M=162]	25	432	4.14e-11	enriched	3.83e-07
HAD_SAK_2 [M=141]	13	85	4.26e-11	enriched	3.95e-07
NT5C [M=180]	12	72	9.75e-11	enriched	9.04e-07
PTH2 [M=116]	10	43	2.05e-10	enriched	1.9e-06
Tn7_Tnp_TnsA_N [M=88]	9	30	2.42e-10	enriched	2.24e-06
RtcB [M=414]	13	101	2.94e-10	enriched	2.72e-06
DUF4055 [M=135]	14	127	3.95e-10	enriched	3.67e-06
DUF1073 [M=357]	13	105	4.54e-10	enriched	4.21e-06
Pyr_excise [M=130]	10	49	6.23e-10	enriched	5.78e-06
DNA_pol_B_exo1 [M=337]	11	69	8.94e-10	enriched	8.29e-06
Terminase_3C [M=155]	13	115	1.25e-09	enriched	1.16e-05
Peptidase_M15_3 [M=113]	17	232	1.91e-09	enriched	1.77e-05
Terminase_3 [M=201]	22	414	2.61e-09	enriched	2.42e-05
LAGLIDADG_3 [M=83]	17	239	2.9e-09	enriched	2.69e-05
RNaseH_C [M=124]	7	16	2.92e-09	enriched	2.71e-05
T4_neck-protein [M=278]	7	16	2.92e-09	enriched	2.71e-05
PhoH [M=205]	19	316	4.73e-09	enriched	4.39e-05
GIY-YIG [M=78]	23	476	6.3e-09	enriched	5.84e-05
RNase_T [M=165]	23	480	7.3e-09	enriched	6.77e-05
Phage_tail_APC [M=60]	7	19	7.63e-09	enriched	7.08e-05
SprT-like [M=114]	10	67	9.17e-09	enriched	8.5e-05
NAPRTase [M=247]	12	112	9.34e-09	enriched	8.66e-05
Gp5_OB [M=144]	6	10	9.66e-09	enriched	8.96e-05
Terminase_2 [M=141]	16	233	1.33e-08	enriched	0.000123529
DUF2786 [M=40]	10	71	1.51e-08	enriched	0.000140199
Phage_sheath_1 [M=168]	11	93	1.51e-08	enriched	0.000140231
UPF0052 [M=293]	8	35	1.51e-08	enriched	0.000140298
DUF4326 [M=82]	13	147	1.9e-08	enriched	0.000176419
ADPrib_exo_Tox [M=197]	7	23	2.28e-08	enriched	0.00021117
DUF2201_N [M=273]	9	57	3.27e-08	enriched	0.00030334
HNH_3 [M=46]	34	1049	3.28e-08	enriched	0.000303805
Peptidase_M15_4 [M=67]	14	186	3.64e-08	enriched	0.000337046
DUF5661 [M=71]	8	41	4.45e-08	enriched	0.000412641
Trans_coact [M=69]	6	14	4.51e-08	enriched	0.000418261
Thymidylate_kin [M=185]	14	191	4.95e-08	enriched	0.000458953
AAA_23 [M=200]	30	883	7.74e-08	enriched	0.000717723
Ribonuc_red_lgN [M=83]	14	199	7.96e-08	enriched	0.000738496
Phage_30_3 [M=138]	5	7	9.39e-08	enriched	0.000870923
AAA_19 [M=145]	32	995	9.63e-08	enriched	0.000892582
HNH [M=47]	29	849	1.13e-07	enriched	0.00105051
NUDIX [M=131]	32	1006	1.22e-07	enriched	0.00112981
RNaseH_like [M=145]	6	20	2.54e-07	enriched	0.00235404
Cpn60_TCP1 [M=491]	15	258	2.85e-07	enriched	0.00264344
Collagen [M=60]	17	335	2.95e-07	enriched	0.0027349
Macro [M=118]	9	77	3.37e-07	enriched	0.00312287
gp45-slide_C [M=105]	5	10	3.47e-07	enriched	0.00321674
CLP_protease [M=182]	20	465	3.48e-07	enriched	0.00322298
Phage_T4_gp19 [M=134]	8	56	3.8e-07	enriched	0.00352306
Response_reg [M=112]	9	3275	4.58e-07	depleted	0.00424205
Fer4_12 [M=137]	16	308	4.85e-07	enriched	0.00449762
ABC_tran [M=137]	13	3921	5.58e-07	depleted	0.00517632
HisKA [M=67]	2	1963	5.7e-07	depleted	0.00528568
RNA_lig_T4_1 [M=220]	8	62	7.67e-07	enriched	0.00710727
Glyco_hydro_108 [M=85]	11	142	7.92e-07	enriched	0.00734176
NADAR [M=164]	10	114	8.74e-07	enriched	0.00810137
CTP_transf_like [M=143]	17	364	8.79e-07	enriched	0.00815172
Phage_Mu_F [M=112]	19	454	9.93e-07	enriched	0.00921069
Phage_portal [M=318]	26	795	1.08e-06	enriched	0.00999239
UvrD_C_2 [M=52]	22	596	1.08e-06	enriched	0.0100439
DnaB_C [M=255]	29	957	1.17e-06	enriched	0.0108582
WYL_2 [M=74]	5	14	1.3e-06	enriched	0.0120278
Phage_clamp_A [M=137]	5	14	1.3e-06	enriched	0.0120278
Endonuclease_7 [M=82]	11	151	1.39e-06	enriched	0.0129029
HNH_5 [M=56]	19	473	1.77e-06	enriched	0.0163808
5_3_exonuc [M=97]	13	226	1.94e-06	enriched	0.0179488
Phage_BR0599 [M=80]	9	97	1.99e-06	enriched	0.0184867
Fer4_14 [M=117]	15	305	2.07e-06	enriched	0.0192233
DUF2213 [M=168]	8	75	2.84e-06	enriched	0.0263249
Phage-tail_3 [M=164]	12	199	3.01e-06	enriched	0.0278798
Helicase_C_2 [M=170]	9	103	3.15e-06	enriched	0.0292419
D5_N [M=151]	11	169	3.87e-06	enriched	0.0358902
TPR_19 [M=68]	0	1224	3.97e-06	depleted	0.0367925
Av_adeno_fibre [M=56]	3	1	4.56e-06	enriched	0.0423105
Radical_SAM [M=167]	33	1239	4.82e-06	enriched	0.0447031
VirE [M=198]	9	112	5.96e-06	enriched	0.0552658
SLT [M=117]	19	520	6.5e-06	enriched	0.0602806
TROVE [M=447]	7	60	6.94e-06	enriched	0.0643169
Pkinase [M=264]	1	1437	6.94e-06	depleted	0.0643294
T4_Gp59_N [M=93]	4	9	7.98e-06	enriched	0.0740205
TPR_16 [M=68]	0	1158	8.47e-06	depleted	0.0785037
Pkinase_Tyr [M=259]	0	1181	9.05e-06	depleted	0.08387
ROS_MUCR [M=125]	5	24	1.21e-05	enriched	0.112579
TPR_2 [M=34]	2	1616	1.27e-05	depleted	0.117509
Glyco_transf_25 [M=200]	6	44	1.41e-05	enriched	0.131047
R2K_2 [M=146]	6	44	1.41e-05	enriched	0.131047
DUF1833 [M=150]	6	45	1.59e-05	enriched	0.147199
UvrD-helicase [M=315]	19	563	1.88e-05	enriched	0.174115
PriCT_2 [M=77]	8	99	1.88e-05	enriched	0.174256
Phage-Gp8 [M=334]	4	12	1.98e-05	enriched	0.183737
R2K_3 [M=200]	6	47	1.99e-05	enriched	0.184318
DUF2612 [M=183]	6	48	2.22e-05	enriched	0.205515
VRR_NUC [M=108]	9	135	2.42e-05	enriched	0.224351
DUF2829 [M=72]	7	74	2.44e-05	enriched	0.226386
Amidase_2 [M=126]	14	336	2.63e-05	enriched	0.244124
DUF2201 [M=123]	6	51	3.03e-05	enriched	0.281127
Phage_holin_3_3 [M=78]	5	30	3.15e-05	enriched	0.292092
AAA [M=132]	44	2082	3.8e-05	enriched	0.352148
ArfA [M=44]	3	4	3.9e-05	enriched	0.36157
Baseplate_J [M=254]	11	223	4.47e-05	enriched	0.414469
T4_baseplate [M=205]	4	16	5.1e-05	enriched	0.473015
AAA_30 [M=192]	27	1045	5.27e-05	enriched	0.488331
DUF3310 [M=60]	10	188	5.4e-05	enriched	0.500537
RlaP [M=246]	7	85	5.57e-05	enriched	0.516106
DHFR_1 [M=160]	10	191	6.12e-05	enriched	0.567582
Ice_binding [M=209]	3	5	6.19e-05	enriched	0.573978
DUF5598 [M=98]	6	59	6.43e-05	enriched	0.595844
DUF2184 [M=251]	6	59	6.43e-05	enriched	0.595844
NUMOD4 [M=50]	10	194	6.93e-05	enriched	0.642114
TPR_12 [M=77]	2	1427	7.11e-05	depleted	0.659077
Por_Secre_tail [M=75]	3	1614	7.19e-05	depleted	0.666273
DNA_ligase_aden [M=319]	10	198	8.14e-05	enriched	0.754292
KR [M=180]	0	946	8.23e-05	depleted	0.763105
SWI2_SNF2 [M=224]	13	333	9.44e-05	enriched	0.875036
DUF4031 [M=79]	5	39	9.75e-05	enriched	0.903673
Beta_helix [M=158]	16	483	0.000101315	enriched	0.939393
NosL [M=131]	0	22	1	depleted	1
Aminopep [M=322]	0	22	1	depleted	1
DUF4296 [M=87]	0	23	1	depleted	1
DUF498 [M=109]	0	23	1	depleted	1
nos_propeller [M=71]	0	23	1	depleted	1
DUF2065 [M=56]	0	23	1	depleted	1
DUF3488 [M=339]	0	23	1	depleted	1
Ysc84 [M=128]	0	23	1	depleted	1
hemP [M=37]	0	23	1	depleted	1
NicO [M=287]	0	23	1	depleted	1
Aa_trans [M=409]	0	23	1	depleted	1
GalP_UDP_transf [M=184]	0	23	1	depleted	1
HPP [M=122]	0	22	1	depleted	1
GldH_lipo [M=128]	0	23	1	depleted	1
ATP-synt_I [M=99]	0	22	1	depleted	1
BLUF [M=92]	0	23	1	depleted	1
FliO [M=89]	0	22	1	depleted	1
TetR_C_30 [M=115]	0	23	1	depleted	1
AAA_8 [M=259]	0	23	1	depleted	1
CcmH [M=143]	0	23	1	depleted	1
DUF1232 [M=37]	0	23	1	depleted	1
MtN3_slv [M=87]	0	23	1	depleted	1
UxuA [M=352]	0	23	1	depleted	1
AMPK1_CBM [M=85]	0	22	1	depleted	1
Chondroitinas_B [M=426]	0	23	1	depleted	1
Glyco_hydro_32C [M=159]	0	23	1	depleted	1
Phage_connector [M=281]	0	23	1	depleted	1
SURF1 [M=199]	0	22	1	depleted	1
HSF_DNA-bind [M=99]	0	22	1	depleted	1
HTH_Tnp_Mu_2 [M=109]	0	22	1	depleted	1
SNF [M=523]	0	22	1	depleted	1
Peptidase_U32_C [M=82]	0	22	1	depleted	1
SUKH_6 [M=121]	0	23	1	depleted	1
DUF456 [M=139]	0	28	1	depleted	1
DUF1471 [M=55]	0	23	1	depleted	1
NQRA [M=257]	0	28	1	depleted	1
SMI1_KNR4 [M=133]	0	28	1	depleted	1
Sulfatase_C [M=124]	0	28	1	depleted	1
NPCBM_assoc [M=79]	0	28	1	depleted	1
DUF4270 [M=439]	0	28	1	depleted	1
DUF2157 [M=147]	0	28	1	depleted	1
WES_acyltransf [M=264]	0	28	1	depleted	1
Pilin [M=109]	0	28	1	depleted	1
LPD29 [M=94]	0	28	1	depleted	1
Glyco_hydro_38N [M=289]	0	28	1	depleted	1
DHODB_Fe-S_bind [M=42]	0	28	1	depleted	1
Lipoprotein_9 [M=237]	0	28	1	depleted	1
Capsid_NCLDV [M=195]	0	28	1	depleted	1
EndIII_4Fe-2S [M=17]	0	28	1	depleted	1
InlK_D3 [M=75]	0	28	1	depleted	1
PEPCK_N [M=218]	0	23	1	depleted	1
DUF5010_C [M=112]	0	28	1	depleted	1
RelB [M=83]	0	28	1	depleted	1
UPF0122 [M=101]	0	23	1	depleted	1
YbbR [M=82]	0	25	1	depleted	1
Phage_TAC_7 [M=83]	0	25	1	depleted	1
sCache_3_3 [M=107]	0	25	1	depleted	1
DUF349 [M=75]	0	23	1	depleted	1
Arm-DNA-bind_2 [M=65]	0	28	1	depleted	1
2OG-FeII_Oxy [M=101]	0	28	1	depleted	1
Pox_A32 [M=242]	0	28	1	depleted	1
FTP [M=51]	0	28	1	depleted	1
TANGO2 [M=254]	0	28	1	depleted	1
DUF481 [M=212]	0	28	1	depleted	1
DREV [M=265]	0	28	1	depleted	1
DHC_N2 [M=398]	0	28	1	depleted	1
Urocanase_N [M=127]	0	28	1	depleted	1
DUF2012 [M=123]	0	28	1	depleted	1
Peptidase_M4_C [M=168]	0	23	1	depleted	1
DUF4293 [M=152]	0	23	1	depleted	1
MAAL_C [M=249]	0	23	1	depleted	1
AAT [M=227]	0	22	1	depleted	1
DIOX_N [M=118]	0	21	1	depleted	1
DUF1194 [M=206]	0	21	1	depleted	1
DUF3048_C [M=112]	0	21	1	depleted	1
AzlC [M=136]	0	21	1	depleted	1
Ribonuclease [M=86]	0	21	1	depleted	1
DUF418 [M=163]	0	21	1	depleted	1
VirB3 [M=84]	0	21	1	depleted	1
VanA_C [M=195]	0	22	1	depleted	1
DUF4407 [M=298]	0	22	1	depleted	1
FA_desaturase_2 [M=326]	0	22	1	depleted	1
DUF2304 [M=106]	0	22	1	depleted	1
ATE_N [M=81]	0	22	1	depleted	1
Peptidase_C11 [M=360]	0	22	1	depleted	1
Peptidase_C69 [M=402]	0	22	1	depleted	1
PTS_IIA [M=94]	0	22	1	depleted	1
Exonuc_X-T_C [M=269]	0	22	1	depleted	1
HypD [M=351]	0	22	1	depleted	1
Tad [M=48]	0	22	1	depleted	1
Fer4_22 [M=96]	0	22	1	depleted	1
PAF-AH_p_II [M=379]	0	22	1	depleted	1
MOFRL [M=109]	0	22	1	depleted	1
Shufflon_N [M=324]	0	22	1	depleted	1
DUF4138 [M=245]	0	22	1	depleted	1
RskA [M=180]	0	22	1	depleted	1
CvfB_WH [M=58]	0	22	1	depleted	1
DAHP_synth_2 [M=437]	0	22	1	depleted	1
Entericidin [M=20]	0	22	1	depleted	1
TilS [M=68]	0	22	1	depleted	1
Ricin_B_lectin [M=127]	0	22	1	depleted	1
CheZ [M=201]	0	22	1	depleted	1
Ribosom_S30AE_C [M=57]	0	22	1	depleted	1
DUF2934 [M=37]	0	22	1	depleted	1
bMG6 [M=112]	0	22	1	depleted	1
zf-CHCC [M=37]	0	22	1	depleted	1
CstA [M=377]	0	23	1	depleted	1
DUF4286 [M=98]	0	23	1	depleted	1
Glyco_hydro_53 [M=340]	0	23	1	depleted	1
DUF2202 [M=162]	0	23	1	depleted	1
Sod_Cu [M=141]	0	23	1	depleted	1
FliW [M=121]	0	23	1	depleted	1
PcrB [M=226]	0	23	1	depleted	1
Glutaminase [M=286]	0	23	1	depleted	1
CENP-F_leu_zip [M=140]	0	23	1	depleted	1
DUF1071 [M=151]	0	23	1	depleted	1
MetallophosN [M=78]	0	28	1	depleted	1
Peptidase_M4 [M=146]	0	23	1	depleted	1
DUF2130 [M=255]	0	23	1	depleted	1
Peptidase_M75 [M=288]	0	23	1	depleted	1
Peptidase_M24_C [M=63]	0	23	1	depleted	1
EptA_B_N [M=152]	0	23	1	depleted	1
ATG16 [M=200]	0	22	1	depleted	1
Cyanophycin_syn [M=115]	0	23	1	depleted	1
hDGE_amylase [M=439]	0	22	1	depleted	1
DUF2156 [M=299]	0	22	1	depleted	1
DUF4097 [M=251]	0	22	1	depleted	1
DUF212 [M=126]	0	22	1	depleted	1
DUF3390 [M=88]	0	22	1	depleted	1
DUF2971 [M=83]	0	22	1	depleted	1
LicD [M=229]	0	22	1	depleted	1
DUF3369 [M=168]	0	22	1	depleted	1
DUF2071 [M=212]	0	22	1	depleted	1
Zincin_1 [M=97]	0	22	1	depleted	1
DUF420 [M=130]	0	22	1	depleted	1
DUF4256 [M=173]	0	22	1	depleted	1
DUF134 [M=98]	0	22	1	depleted	1
ACP_PD [M=105]	0	22	1	depleted	1
XFP [M=176]	0	22	1	depleted	1
Dak2 [M=175]	0	27	1	depleted	1
DUF4159 [M=205]	0	29	1	depleted	1
Phage_r1t_holin [M=72]	0	27	1	depleted	1
SusF_SusE [M=134]	0	26	1	depleted	1
DUF3570 [M=418]	0	26	1	depleted	1
DUF4147 [M=235]	0	26	1	depleted	1
DUF3846 [M=91]	0	26	1	depleted	1
Capsid_N [M=207]	0	26	1	depleted	1
Creatinase_N_2 [M=160]	0	26	1	depleted	1
HHH_8 [M=67]	0	26	1	depleted	1
Form_Nir_trans [M=236]	0	26	1	depleted	1
Lactate_perm [M=522]	0	26	1	depleted	1
IF-2B [M=282]	0	26	1	depleted	1
Urocanase [M=210]	0	26	1	depleted	1
Glyco_hydro_36 [M=423]	0	26	1	depleted	1
SpvB [M=290]	0	26	1	depleted	1
YdjC [M=251]	0	26	1	depleted	1
DUF3102 [M=130]	0	26	1	depleted	1
GalKase_gal_bdg [M=50]	0	26	1	depleted	1
DUF4116 [M=49]	0	26	1	depleted	1
BMC [M=74]	0	28	1	depleted	1
GspH [M=110]	0	28	1	depleted	1
CO_deh_flav_C [M=103]	0	28	1	depleted	1
ERAP1_C [M=315]	0	28	1	depleted	1
YafQ_toxin [M=88]	0	29	1	depleted	1
FAD_binding_8 [M=109]	0	29	1	depleted	1
CutC [M=202]	0	26	1	depleted	1
TctB [M=135]	0	29	1	depleted	1
DUF4145 [M=88]	0	29	1	depleted	1
Septin [M=281]	0	22	1	depleted	1
DUF2256 [M=40]	0	27	1	depleted	1
Ligase_CoA_2 [M=162]	0	27	1	depleted	1
DcuC [M=465]	0	27	1	depleted	1
AceK [M=561]	0	26	1	depleted	1
SAM_adeno_trans [M=233]	0	29	1	depleted	1
DUF3575 [M=176]	0	26	1	depleted	1
DUF4062 [M=83]	0	26	1	depleted	1
DUF480 [M=149]	0	26	1	depleted	1
DUF2188 [M=62]	0	25	1	depleted	1
Lipocalin_2 [M=143]	0	25	1	depleted	1
PapD_N [M=124]	0	25	1	depleted	1
Arylsulfotran_2 [M=299]	0	25	1	depleted	1
Patched [M=811]	0	25	1	depleted	1
PepSY_2 [M=84]	0	25	1	depleted	1
PaaB [M=89]	0	25	1	depleted	1
EsV_1_7_cys [M=26]	0	25	1	depleted	1
LRV [M=26]	0	25	1	depleted	1
T2SSM [M=160]	0	25	1	depleted	1
DUF3520 [M=185]	0	25	1	depleted	1
fn3_3 [M=75]	0	25	1	depleted	1
Phage_P2_GpU [M=120]	0	25	1	depleted	1
DUF4835 [M=276]	0	25	1	depleted	1
UPF0160 [M=318]	0	25	1	depleted	1
MltA [M=226]	0	28	1	depleted	1
Lipoprotein_18 [M=321]	0	25	1	depleted	1
Glyco_hyd_65N_2 [M=239]	0	25	1	depleted	1
IF2_assoc [M=39]	0	26	1	depleted	1
Mfa_like_1 [M=250]	0	26	1	depleted	1
DUF3458_C [M=319]	0	26	1	depleted	1
DUF4845 [M=85]	0	26	1	depleted	1
KAsynt_C_assoc [M=112]	0	26	1	depleted	1
BACON [M=53]	0	25	1	depleted	1
DUF445 [M=367]	0	25	1	depleted	1
DUF3560 [M=124]	0	25	1	depleted	1
CHAD [M=227]	0	25	1	depleted	1
Glyco_hydro_cc [M=239]	0	25	1	depleted	1
Iron_traffic [M=88]	0	25	1	depleted	1
CENP-B_N [M=53]	0	25	1	depleted	1
YhhN [M=184]	0	25	1	depleted	1
LpoB [M=147]	0	25	1	depleted	1
LytR_C [M=85]	0	25	1	depleted	1
UPF0016 [M=75]	0	27	1	depleted	1
Polysacc_lyase [M=210]	0	28	1	depleted	1
DUF3362 [M=150]	0	28	1	depleted	1
CagE_TrbE_VirB [M=206]	0	29	1	depleted	1
Cadherin-like [M=93]	0	29	1	depleted	1
Bac_rhamnosid_C [M=78]	0	29	1	depleted	1
Invasin_D3 [M=97]	0	29	1	depleted	1
Pyridox_oxase_2 [M=100]	0	29	1	depleted	1
GldM_N [M=194]	0	28	1	depleted	1
Pectate_lyase22 [M=386]	0	28	1	depleted	1
Unstab_antitox [M=54]	0	27	1	depleted	1
PYC_OADA [M=200]	0	28	1	depleted	1
bMG5 [M=127]	0	27	1	depleted	1
RPA [M=229]	0	27	1	depleted	1
Carb_anhydrase [M=254]	0	27	1	depleted	1
HupF_HypC [M=65]	0	27	1	depleted	1
Flagellin_IN [M=56]	0	27	1	depleted	1
Catalase [M=383]	0	27	1	depleted	1
DUF308 [M=73]	0	27	1	depleted	1
DUF4953 [M=320]	0	27	1	depleted	1
CobT_C [M=219]	0	27	1	depleted	1
TniQ [M=137]	0	27	1	depleted	1
SlyX [M=67]	0	27	1	depleted	1
7TM-7TMR_HD [M=194]	0	27	1	depleted	1
CHASE8 [M=102]	0	27	1	depleted	1
ABC_trans_aux [M=161]	0	27	1	depleted	1
Exo_endo_phos_2 [M=119]	0	29	1	depleted	1
Gly_kinase [M=366]	0	27	1	depleted	1
CbiQ [M=218]	0	27	1	depleted	1
FlgM [M=55]	0	27	1	depleted	1
GDPD_2 [M=30]	0	27	1	depleted	1
ATP_bind_1 [M=241]	0	27	1	depleted	1
ATP-synt_DE [M=47]	0	27	1	depleted	1
DUF2924 [M=135]	0	27	1	depleted	1
Glyco_trans_1_3 [M=322]	0	27	1	depleted	1
WLM [M=191]	0	29	1	depleted	1
TaqI_C [M=120]	0	29	1	depleted	1
Phage_min_cap2 [M=366]	0	29	1	depleted	1
Pepdidase_M14_N [M=107]	0	29	1	depleted	1
GrpB [M=160]	0	29	1	depleted	1
GldM_C [M=176]	0	28	1	depleted	1
Glyco_hydro_30 [M=348]	0	28	1	depleted	1
Phage_Nu1 [M=164]	0	28	1	depleted	1
MipA [M=212]	0	28	1	depleted	1
PhzC-PhzF [M=283]	0	28	1	depleted	1
DUF4224 [M=45]	0	28	1	depleted	1
TetR_C_24 [M=114]	0	28	1	depleted	1
Y_phosphatase3 [M=232]	0	28	1	depleted	1
OKR_DC_1_C [M=132]	0	28	1	depleted	1
HupE_UreJ_2 [M=154]	0	28	1	depleted	1
ANTAR [M=54]	0	28	1	depleted	1
Nucleos_tra2_N [M=74]	0	28	1	depleted	1
DUF3471 [M=103]	0	28	1	depleted	1
DUF3459 [M=91]	0	28	1	depleted	1
Sterol-sensing [M=153]	0	29	1	depleted	1
FliE [M=89]	0	29	1	depleted	1
Vsr [M=74]	0	29	1	depleted	1
Melibiase [M=347]	0	29	1	depleted	1
DUF4015 [M=314]	0	29	1	depleted	1
KfrA_N [M=117]	0	29	1	depleted	1
YmdB [M=253]	0	29	1	depleted	1
SpoIID [M=94]	0	29	1	depleted	1
Radical_SAM_N [M=298]	0	29	1	depleted	1
DUF4340 [M=184]	0	29	1	depleted	1
Glyco_hydro_63 [M=491]	0	29	1	depleted	1
HNH_2 [M=73]	0	29	1	depleted	1
CopD [M=105]	0	29	1	depleted	1
SpecificRecomb [M=640]	0	29	1	depleted	1
zf-HC2 [M=35]	0	29	1	depleted	1
UPF0225 [M=99]	0	29	1	depleted	1
CRS1_YhbY [M=84]	0	29	1	depleted	1
Dyp_perox [M=327]	0	22	1	depleted	1
MliC [M=67]	0	23	1	depleted	1
Transglut_core2 [M=155]	0	22	1	depleted	1
zf-TFIIB [M=41]	0	36	1	depleted	1
Cas_Cas4 [M=163]	0	36	1	depleted	1
UPF0047 [M=115]	0	36	1	depleted	1
AAA-ATPase_like [M=279]	0	36	1	depleted	1
DUF3592 [M=149]	0	36	1	depleted	1
Nfu_N [M=88]	0	36	1	depleted	1
RepB_primase [M=240]	0	36	1	depleted	1
CobD_Cbib [M=277]	0	36	1	depleted	1
Methyltransf_13 [M=62]	0	36	1	depleted	1
PepX_C [M=217]	0	36	1	depleted	1
TetR_C_13 [M=115]	0	36	1	depleted	1
KdpC [M=182]	0	36	1	depleted	1
Omp28 [M=170]	0	36	1	depleted	1
zinc_ribbon_4 [M=36]	0	36	1	depleted	1
Peptidase_M3_N [M=70]	0	36	1	depleted	1
PBP5_C [M=92]	0	36	1	depleted	1
DUF4197 [M=201]	0	36	1	depleted	1
Asparaginase_2 [M=306]	0	37	1	depleted	1
SWIB [M=74]	0	36	1	depleted	1
TctA [M=409]	0	37	1	depleted	1
TED_complement [M=313]	0	36	1	depleted	1
Peptidase_M48_N [M=181]	0	36	1	depleted	1
DZR_2 [M=56]	0	35	1	depleted	1
Alginate_exp [M=400]	0	39	1	depleted	1
FtsQ [M=115]	0	35	1	depleted	1
GH43_C2 [M=202]	0	35	1	depleted	1
DoxX_2 [M=103]	0	35	1	depleted	1
OKR_DC_1 [M=417]	0	35	1	depleted	1
Nitrate_red_del [M=138]	0	36	1	depleted	1
ETF_QO [M=104]	0	36	1	depleted	1
SPRY [M=120]	0	36	1	depleted	1
Mito_carr [M=97]	0	35	1	depleted	1
SDH_beta [M=155]	0	37	1	depleted	1
Toprim_Crpt [M=61]	0	37	1	depleted	1
DUF502 [M=106]	0	38	1	depleted	1
YjdM_Zn_Ribbon [M=30]	0	38	1	depleted	1
DUF423 [M=88]	0	38	1	depleted	1
AA_permease_C [M=51]	0	38	1	depleted	1
Phage_TAC_11 [M=98]	0	39	1	depleted	1
OB_Dis3 [M=77]	0	39	1	depleted	1
DUF3700 [M=228]	0	39	1	depleted	1
DUF2911 [M=145]	0	38	1	depleted	1
Glyco_tran_WecB [M=168]	0	38	1	depleted	1
YqgF [M=150]	0	38	1	depleted	1
DUF2339 [M=668]	0	38	1	depleted	1
DUF839 [M=516]	0	37	1	depleted	1
Peptidase_C2 [M=297]	0	37	1	depleted	1
DUF2063 [M=85]	0	37	1	depleted	1
PSD3 [M=65]	0	37	1	depleted	1
ThiC_Rad_SAM [M=418]	0	37	1	depleted	1
Radical_SAM_C [M=82]	0	37	1	depleted	1
DUF2442 [M=79]	0	38	1	depleted	1
DPRP [M=224]	0	38	1	depleted	1
Thioredoxin_5 [M=186]	0	38	1	depleted	1
Neisseria_PilC [M=367]	0	38	1	depleted	1
ACT_6 [M=76]	0	38	1	depleted	1
NTP_transf_5 [M=251]	0	38	1	depleted	1
DUF1624 [M=223]	0	38	1	depleted	1
Apocytochr_F_C [M=118]	0	38	1	depleted	1
Peptidase_M61_N [M=167]	0	38	1	depleted	1
OPT [M=616]	0	38	1	depleted	1
FAD_binding_5 [M=171]	0	38	1	depleted	1
Methyltransf_8 [M=219]	0	38	1	depleted	1
PglZ [M=176]	0	38	1	depleted	1
DUF2189 [M=126]	0	38	1	depleted	1
WGR [M=80]	0	38	1	depleted	1
DUF3971 [M=289]	0	38	1	depleted	1
HAMP_2 [M=67]	0	38	1	depleted	1
GHL6 [M=137]	0	37	1	depleted	1
DUF1329 [M=368]	0	37	1	depleted	1
Hydantoinase_B [M=516]	0	37	1	depleted	1
Bmp [M=302]	0	41	1	depleted	1
LacY_symp [M=413]	0	41	1	depleted	1
Methyltransf_10 [M=299]	0	41	1	depleted	1
R3H [M=60]	0	41	1	depleted	1
Hepar_II_III [M=237]	0	41	1	depleted	1
Copper-bind [M=99]	0	41	1	depleted	1
RT_RNaseH_2 [M=100]	0	41	1	depleted	1
DUF2126 [M=821]	0	41	1	depleted	1
ApbA_C [M=125]	0	41	1	depleted	1
S4_2 [M=65]	0	41	1	depleted	1
DUF5128 [M=321]	0	41	1	depleted	1
Peptidase_M15 [M=201]	0	41	1	depleted	1
FMO-like [M=532]	0	41	1	depleted	1
DUF805 [M=105]	0	42	1	depleted	1
DUF4442 [M=132]	0	42	1	depleted	1
FliJ [M=123]	0	41	1	depleted	1
DUF3800 [M=108]	0	42	1	depleted	1
FixH [M=146]	0	43	1	depleted	1
PBP [M=132]	0	43	1	depleted	1
FixP_N [M=48]	0	43	1	depleted	1
PDDEXK_2 [M=228]	0	43	1	depleted	1
DUF3486 [M=180]	0	43	1	depleted	1
DUF3244 [M=101]	0	43	1	depleted	1
BBP2 [M=347]	0	41	1	depleted	1
Creatinase_N [M=131]	0	43	1	depleted	1
VIT [M=111]	0	43	1	depleted	1
EIIA-man [M=116]	0	43	1	depleted	1
ResB [M=496]	0	43	1	depleted	1
CBM_6 [M=125]	0	43	1	depleted	1
LTXXQ [M=104]	0	43	1	depleted	1
RicinB_lectin_2 [M=89]	0	43	1	depleted	1
MraY_sig1 [M=13]	0	43	1	depleted	1
Cas_Cas1 [M=283]	0	41	1	depleted	1
CcmB [M=215]	0	41	1	depleted	1
SufE [M=122]	0	41	1	depleted	1
HCBP_related [M=42]	0	36	1	depleted	1
PUA [M=74]	0	36	1	depleted	1
RES [M=162]	0	37	1	depleted	1
Fer4_15 [M=66]	0	37	1	depleted	1
DUF2461 [M=208]	0	37	1	depleted	1
GHL10 [M=311]	0	37	1	depleted	1
DUF1254 [M=133]	0	36	1	depleted	1
DsbC_N [M=54]	0	37	1	depleted	1
FliD_N [M=97]	0	37	1	depleted	1
MoaE [M=113]	0	37	1	depleted	1
OCD_Mu_crystall [M=318]	0	37	1	depleted	1
TolB_N [M=106]	0	37	1	depleted	1
Abhydrolase_4 [M=103]	0	37	1	depleted	1
DUF3485 [M=204]	0	37	1	depleted	1
FGAR-AT_N [M=115]	0	37	1	depleted	1
THDPS_N_2 [M=67]	0	37	1	depleted	1
Mannitol_dh_C [M=246]	0	36	1	depleted	1
ASL_C2 [M=69]	0	36	1	depleted	1
YoeB_toxin [M=80]	0	41	1	depleted	1
YbjQ_1 [M=104]	0	41	1	depleted	1
DUF1778 [M=80]	0	41	1	depleted	1
DUF86 [M=119]	0	41	1	depleted	1
Fer4_13 [M=58]	0	42	1	depleted	1
DUF1015 [M=310]	0	42	1	depleted	1
Malate_synthase [M=526]	0	36	1	depleted	1
Rimk_N [M=94]	0	42	1	depleted	1
Mob_synth_C [M=128]	0	42	1	depleted	1
PLDc_N [M=42]	0	35	1	depleted	1
MoaC [M=136]	0	39	1	depleted	1
DUF2200 [M=111]	0	39	1	depleted	1
DUF2723 [M=169]	0	36	1	depleted	1
Mannitol_dh [M=151]	0	36	1	depleted	1
Methyltransf_14 [M=160]	0	42	1	depleted	1
FlgD [M=75]	0	37	1	depleted	1
DUF723 [M=60]	0	37	1	depleted	1
YscJ_FliF_C [M=149]	0	37	1	depleted	1
OST-HTH [M=72]	0	25	1	depleted	1
GLEYA [M=91]	0	25	1	depleted	1
DUF4178 [M=141]	0	25	1	depleted	1
OB_NTP_bind [M=83]	0	25	1	depleted	1
DUF72 [M=219]	0	25	1	depleted	1
BshC [M=539]	0	25	1	depleted	1
DUF1684 [M=141]	0	25	1	depleted	1
Cupin_6 [M=183]	0	25	1	depleted	1
MreD [M=160]	0	25	1	depleted	1
Mrr_cat_2 [M=127]	0	25	1	depleted	1
DUF4212 [M=79]	0	25	1	depleted	1
CreD [M=428]	0	25	1	depleted	1
CZB [M=59]	0	25	1	depleted	1
DUF4290 [M=174]	0	25	1	depleted	1
TIR [M=176]	0	25	1	depleted	1
YHYH [M=196]	0	25	1	depleted	1
RcpC [M=116]	0	25	1	depleted	1
SpoIIM [M=156]	0	23	1	depleted	1
TetR_C_7 [M=119]	0	24	1	depleted	1
Ada_Zn_binding [M=65]	0	24	1	depleted	1
YfhO [M=840]	0	24	1	depleted	1
BKACE [M=274]	0	23	1	depleted	1
XylR_N [M=101]	0	24	1	depleted	1
DUF2752 [M=49]	0	25	1	depleted	1
Glyco_hydro_9 [M=440]	0	24	1	depleted	1
Tail_tube [M=117]	0	25	1	depleted	1
Abhydrolase_5 [M=164]	0	25	1	depleted	1
TraH [M=359]	0	25	1	depleted	1
DUF348 [M=41]	0	25	1	depleted	1
Phg_2220_C [M=74]	0	25	1	depleted	1
LZ_Tnp_IS481 [M=85]	0	25	1	depleted	1
DUF5777 [M=245]	0	25	1	depleted	1
TraE [M=182]	0	25	1	depleted	1
HD_6 [M=196]	0	24	1	depleted	1
HrpB1_HrpK [M=126]	0	25	1	depleted	1
DUF962 [M=95]	0	24	1	depleted	1
TraI_2 [M=325]	0	24	1	depleted	1
DUF4295 [M=47]	0	24	1	depleted	1
Trehalose_PPase [M=233]	0	24	1	depleted	1
Phage_Mu_Gp45 [M=68]	0	24	1	depleted	1
TrbC_Ftype [M=111]	0	24	1	depleted	1
Replicase [M=130]	0	24	1	depleted	1
DUF1572 [M=163]	0	24	1	depleted	1
Phage_tube [M=166]	0	25	1	depleted	1
ddrB-ParB [M=124]	0	25	1	depleted	1
Meth_synt_1 [M=313]	0	23	1	depleted	1
MerT [M=116]	0	23	1	depleted	1
Mal_decarbox_Al [M=547]	0	22	1	depleted	1
HSCB_C [M=75]	0	22	1	depleted	1
zf-CDGSH [M=48]	0	24	1	depleted	1
DUF615 [M=154]	0	23	1	depleted	1
AMMECR1 [M=167]	0	24	1	depleted	1
Biopterin_H [M=331]	0	24	1	depleted	1
Cupin_4 [M=319]	0	24	1	depleted	1
Peptidase_M36 [M=372]	0	24	1	depleted	1
WS_DGAT_C [M=145]	0	24	1	depleted	1
ABC_trans_CmpB [M=149]	0	24	1	depleted	1
DrsE_2 [M=153]	0	24	1	depleted	1
TolA_bind_tri [M=76]	0	24	1	depleted	1
TPK_catalytic [M=121]	0	24	1	depleted	1
DUF4010 [M=210]	0	24	1	depleted	1
HisG_C [M=73]	0	24	1	depleted	1
Inovirus_Gp2 [M=179]	0	24	1	depleted	1
Glyco_transf_36 [M=251]	0	24	1	depleted	1
ALGX [M=268]	0	24	1	depleted	1
KduI [M=261]	0	24	1	depleted	1
Pro_dh-DNA_bdg [M=112]	0	24	1	depleted	1
DUF4400 [M=204]	0	24	1	depleted	1
Phage_rep_org_N [M=121]	0	23	1	depleted	1
DUF4126 [M=175]	0	23	1	depleted	1
T6SS_TssF [M=605]	0	23	1	depleted	1
PDH_E1_M [M=229]	0	29	1	depleted	1
DUF2007 [M=67]	0	29	1	depleted	1
ThiC-associated [M=81]	0	29	1	depleted	1
FlhC [M=173]	0	24	1	depleted	1
PCuAC [M=109]	0	24	1	depleted	1
MOSC_N [M=120]	0	24	1	depleted	1
Apolipoprotein [M=190]	0	38	1	depleted	1
CT_A_B [M=264]	0	24	1	depleted	1
DUF3656 [M=107]	0	24	1	depleted	1
VF530 [M=63]	0	24	1	depleted	1
DUF2520 [M=126]	0	24	1	depleted	1
7TMR-HDED [M=220]	0	24	1	depleted	1
Gln-synt_C-ter [M=118]	0	24	1	depleted	1
CheX [M=94]	0	24	1	depleted	1
DUF5110 [M=71]	0	24	1	depleted	1
Alkyl_sulf_dimr [M=139]	0	24	1	depleted	1
DUF937 [M=137]	0	38	1	depleted	1
LppC [M=535]	0	38	1	depleted	1
DUF676 [M=219]	0	37	1	depleted	1
Big_6 [M=83]	0	37	1	depleted	1
Acetyltransf_8 [M=145]	0	37	1	depleted	1
FliD_C [M=240]	0	37	1	depleted	1
Gal_mutarotas_2 [M=68]	0	37	1	depleted	1
OpuAC [M=257]	0	37	1	depleted	1
HTH_6 [M=77]	0	38	1	depleted	1
Hfq [M=64]	0	37	1	depleted	1
FeS [M=33]	0	38	1	depleted	1
Thr_dehydrat_C [M=91]	0	38	1	depleted	1
HlyIII [M=224]	0	38	1	depleted	1
DisA_N [M=119]	0	38	1	depleted	1
DUF3667 [M=45]	0	38	1	depleted	1
Hydantoinase_A [M=291]	0	38	1	depleted	1
Spc7 [M=311]	0	37	1	depleted	1
GshA [M=402]	0	22	1	depleted	1
CheD [M=109]	0	24	1	depleted	1
ABC2_membrane_5 [M=206]	0	24	1	depleted	1
MiaE [M=240]	0	23	1	depleted	1
Sbt_1 [M=308]	0	23	1	depleted	1
HigB_toxin [M=74]	0	23	1	depleted	1
DUF4397 [M=121]	0	25	1	depleted	1
DUF4325 [M=64]	0	23	1	depleted	1
BetaGal_dom4_5 [M=114]	0	23	1	depleted	1
Nudix_N_2 [M=34]	0	23	1	depleted	1
DUF4349 [M=212]	0	23	1	depleted	1
SecD-TM1 [M=103]	0	23	1	depleted	1
HrcA_DNA-bdg [M=79]	0	23	1	depleted	1
SWIM [M=40]	0	23	1	depleted	1
TraK [M=231]	0	23	1	depleted	1
HemX [M=236]	0	23	1	depleted	1
DDE_2 [M=219]	0	23	1	depleted	1
Fis1_TPR_C [M=53]	0	23	1	depleted	1
DDR [M=328]	0	24	1	depleted	1
CT_C_D [M=202]	0	23	1	depleted	1
GyrB_insert [M=167]	0	23	1	depleted	1
DCD [M=360]	0	24	1	depleted	1
Fe-S_assembly [M=64]	0	24	1	depleted	1
YibE_F [M=241]	0	24	1	depleted	1
Anti-TRAP [M=59]	0	24	1	depleted	1
NIT [M=228]	0	24	1	depleted	1
Mqo [M=489]	0	24	1	depleted	1
DUF4175 [M=826]	0	23	1	depleted	1
SirB [M=119]	0	24	1	depleted	1
TPT [M=290]	0	24	1	depleted	1
Hpr_kinase_N [M=125]	0	24	1	depleted	1
Ldh_2 [M=333]	0	24	1	depleted	1
DUF5683 [M=151]	0	24	1	depleted	1
SbmA_BacA [M=315]	0	24	1	depleted	1
tRNA_anti-like [M=161]	0	24	1	depleted	1
AAA_lid_6 [M=61]	0	24	1	depleted	1
LrgA [M=94]	0	26	1	depleted	1
GCV_T_C [M=80]	0	82	1	depleted	1
Chal_sti_synt_N [M=225]	0	26	1	depleted	1
Ribosomal_L4 [M=192]	1	150	1	depleted	1
Ribosomal_L25p [M=81]	1	117	1	depleted	1
Ribosomal_L21p [M=100]	1	128	1	depleted	1
Ribosomal_L16 [M=132]	1	145	1	depleted	1
Ribosomal_L14 [M=122]	1	153	1	depleted	1
Ribosomal_L12_N [M=48]	1	118	1	depleted	1
Ribosomal_L12 [M=67]	1	149	1	depleted	1
Ribosomal_S17 [M=68]	1	139	1	depleted	1
Ribosomal_L10 [M=100]	1	130	1	depleted	1
HTH_21 [M=60]	2	245	1	depleted	1
CitMHS [M=295]	2	204	1	depleted	1
Zn_ribbon_recom [M=58]	1	185	1	depleted	1
Peptidase_M16 [M=149]	2	283	1	depleted	1
Glyco_tranf_2_3 [M=230]	10	981	1	depleted	1
HTH_23 [M=50]	7	753	1	depleted	1
Thioredoxin [M=103]	7	660	1	enriched	1
Peptidase_M23 [M=96]	6	597	1	depleted	1
B12-binding [M=121]	2	229	1	depleted	1
DUF3168 [M=117]	2	205	1	depleted	1
ClpB_D2-small [M=81]	3	366	1	depleted	1
Ank_3 [M=31]	3	333	1	depleted	1
LRR_8 [M=61]	3	302	1	depleted	1
His_Phos_1 [M=194]	3	287	1	depleted	1
Ribosomal_L29 [M=57]	1	117	1	depleted	1
YqaJ [M=148]	3	321	1	depleted	1
Ank_5 [M=56]	4	412	1	depleted	1
Acetyltransf_3 [M=138]	4	436	1	depleted	1
DnaB [M=103]	4	431	1	depleted	1
Trypsin_2 [M=150]	4	442	1	depleted	1
Terminase_1 [M=468]	5	481	1	depleted	1
AAA_24 [M=196]	5	494	1	depleted	1
GATase_7 [M=123]	3	355	1	depleted	1
Ribosom_S12_S23 [M=114]	1	145	1	depleted	1
Ribosomal_L33 [M=47]	1	121	1	depleted	1
Ribonuclease_3 [M=105]	1	149	1	depleted	1
PEMT [M=106]	0	93	1	depleted	1
GMC_oxred_N [M=296]	0	93	1	depleted	1
RecR [M=40]	0	93	1	depleted	1
PLDc [M=28]	0	93	1	depleted	1
MreC [M=150]	0	93	1	depleted	1
TruB_C_2 [M=64]	0	93	1	depleted	1
ZnuA [M=247]	0	93	1	depleted	1
NADH_4Fe-4S [M=85]	0	93	1	depleted	1
SPOUT_MTase [M=154]	0	94	1	depleted	1
PseudoU_synth_1 [M=108]	0	94	1	depleted	1
5_nucleotid_C [M=158]	0	94	1	depleted	1
Pkinase_fungal [M=395]	0	94	1	depleted	1
DiS_P_DiS [M=84]	0	94	1	depleted	1
SBP_bac_10 [M=274]	0	94	1	depleted	1
DUF4096 [M=75]	0	94	1	depleted	1
2-Hacid_dh [M=134]	2	216	1	depleted	1
HSP90 [M=518]	0	93	1	depleted	1
Metalloenzyme [M=248]	1	161	1	depleted	1
dCache_1 [M=243]	1	160	1	depleted	1
ACP_syn_III_C [M=90]	1	143	1	depleted	1
Ribosomal_TL5_C [M=85]	1	110	1	depleted	1
Ribul_P_3_epim [M=198]	1	112	1	depleted	1
Ribonucleas_3_3 [M=128]	1	151	1	depleted	1
zf-RING_2 [M=44]	1	113	1	depleted	1
LGT [M=242]	1	119	1	depleted	1
ATP-grasp_3 [M=161]	2	260	1	depleted	1
HDOD [M=196]	2	212	1	depleted	1
FMN_red [M=156]	2	201	1	depleted	1
AI-2E_transport [M=327]	2	231	1	depleted	1
tRNA-synt_1c [M=314]	2	276	1	depleted	1
fn3 [M=85]	2	259	1	depleted	1
Big_13 [M=102]	0	89	1	depleted	1
HemolysinCabind [M=36]	2	283	1	depleted	1
NMT1_2 [M=252]	0	94	1	depleted	1
Toprim_N [M=128]	2	206	1	depleted	1
Peripla_BP_4 [M=257]	2	248	1	depleted	1
RNase_HII [M=198]	1	131	1	depleted	1
Cation_efflux [M=199]	1	182	1	depleted	1
tRNA-synt_1d [M=349]	1	148	1	depleted	1
tRNA-synt_2c [M=552]	1	187	1	depleted	1
RNB [M=323]	1	148	1	depleted	1
CarD_CdnL_TRCF [M=97]	1	98	1	depleted	1
RelA_SpoT [M=117]	1	167	1	depleted	1
AAA_12 [M=199]	1	130	1	depleted	1
RecJ_OB [M=108]	1	116	1	depleted	1
eIF-1a [M=64]	1	167	1	depleted	1
RadC [M=122]	1	181	1	depleted	1
60KD_IMP [M=166]	1	151	1	depleted	1
UvrC_HhH_N [M=161]	1	140	1	depleted	1
UvrB_inter [M=91]	1	182	1	depleted	1
Arf [M=175]	1	133	1	depleted	1
Arg_tRNA_synt_N [M=85]	1	116	1	depleted	1
PriA_3primeBD [M=96]	1	102	1	depleted	1
SNAP [M=282]	0	76	1	depleted	1
Carb_kinase [M=244]	0	76	1	depleted	1
Glyoxalase_6 [M=106]	0	76	1	depleted	1
SRP_SPB [M=100]	0	70	1	depleted	1
TatC [M=207]	0	89	1	depleted	1
DeoRC [M=160]	0	89	1	depleted	1
SCO1-SenC [M=134]	1	146	1	depleted	1
SDH_sah [M=286]	1	94	1	enriched	1
Actin [M=385]	1	96	1	depleted	1
Tubulin [M=197]	1	158	1	depleted	1
Aminotran_4 [M=223]	1	181	1	depleted	1
TsaE [M=128]	1	187	1	depleted	1
ATPgrasp_Ter [M=131]	1	100	1	depleted	1
TerC [M=180]	1	182	1	depleted	1
Beta-lactamase2 [M=201]	1	176	1	depleted	1
CTP_synth_N [M=265]	1	140	1	depleted	1
SASA [M=225]	1	146	1	depleted	1
S-AdoMet_synt_C [M=138]	1	97	1	depleted	1
Semialdhyde_dhC [M=184]	1	120	1	depleted	1
Sigma70_ECF [M=185]	1	178	1	depleted	1
BNR_2 [M=278]	1	95	1	depleted	1
VWA_3 [M=155]	1	100	1	depleted	1
Sod_Fe_C [M=101]	1	151	1	depleted	1
YdaS_antitoxin [M=65]	1	161	1	depleted	1
Semialdhyde_dh [M=121]	1	164	1	depleted	1
RuvC [M=148]	1	157	1	depleted	1
MetW [M=193]	1	152	1	depleted	1
Ribosomal_S3_C [M=83]	1	144	1	depleted	1
Ribosomal_L1 [M=204]	1	124	1	depleted	1
PAPS_reduct [M=174]	2	266	1	depleted	1
ATPase_2 [M=233]	2	223	1	depleted	1
PP-binding [M=67]	2	268	1	depleted	1
YceI [M=146]	1	185	1	depleted	1
DUF935 [M=520]	2	210	1	depleted	1
SecA_DEAD [M=290]	1	185	1	depleted	1
WYL [M=171]	1	111	1	depleted	1
DUF5309 [M=283]	1	139	1	depleted	1
MGS [M=95]	1	140	1	depleted	1
Dam [M=171]	1	155	1	depleted	1
DctM [M=416]	1	157	1	depleted	1
He_PIG [M=96]	1	96	1	depleted	1
H_PPase [M=649]	1	98	1	depleted	1
SIS_2 [M=138]	1	118	1	depleted	1
DinB_2 [M=128]	1	135	1	depleted	1
KH_4 [M=73]	1	117	1	depleted	1
IlvN [M=165]	1	107	1	depleted	1
Ketoacyl-synt_C [M=119]	1	167	1	depleted	1
IF3_N [M=70]	1	140	1	depleted	1
IF3_C [M=86]	1	146	1	depleted	1
DXP_synthase_N [M=273]	1	178	1	depleted	1
Dockerin_1 [M=58]	1	101	1	depleted	1
PASTA [M=63]	0	76	1	depleted	1
GTP_cyclohydro2 [M=164]	0	94	1	depleted	1
Orn_DAP_Arg_deC [M=95]	1	129	1	depleted	1
HA2 [M=109]	0	50	1	depleted	1
Cytochrom_B_C [M=103]	0	50	1	depleted	1
DinB [M=166]	0	50	1	depleted	1
SnoaL [M=126]	0	50	1	depleted	1
Peptidase_S66 [M=119]	0	50	1	depleted	1
MFS_MOT1 [M=111]	0	50	1	depleted	1
GH3 [M=527]	0	70	1	depleted	1
RsfS [M=100]	0	70	1	depleted	1
Condensation [M=457]	0	70	1	depleted	1
Gp_dh_C [M=158]	1	150	1	depleted	1
Peptidase_M28 [M=198]	1	181	1	depleted	1
DUF1080 [M=185]	1	136	1	depleted	1
Peptidase_C1 [M=218]	1	145	1	depleted	1
DNA_processg_A [M=210]	1	168	1	depleted	1
Peptidase_M41 [M=191]	1	186	1	depleted	1
Peptidase_M78 [M=123]	1	144	1	depleted	1
Peptidase_S11 [M=241]	1	163	1	depleted	1
NAD_binding_3 [M=117]	1	107	1	depleted	1
NUDIX_4 [M=110]	1	117	1	depleted	1
NMT1 [M=216]	1	168	1	depleted	1
NDK [M=135]	1	128	1	depleted	1
PK_C [M=116]	1	106	1	depleted	1
DDE_3 [M=146]	1	136	1	depleted	1
Bac_export_1 [M=230]	0	50	1	depleted	1
DDE_Tnp_1_3 [M=155]	1	126	1	depleted	1
Phage_int_SAM_3 [M=58]	1	145	1	depleted	1
CoA_binding_3 [M=175]	1	112	1	depleted	1
Polbeta [M=93]	1	100	1	depleted	1
CxxCxxCC [M=85]	1	99	1	depleted	1
DUF11 [M=114]	1	165	1	depleted	1
Peptidase_S46 [M=698]	1	112	1	depleted	1
DNA_binding_1 [M=81]	1	181	1	depleted	1
Bac_GDH [M=1531]	0	50	1	depleted	1
DUF393 [M=113]	0	50	1	depleted	1
FBPase [M=189]	0	50	1	depleted	1
PATR [M=30]	0	50	1	depleted	1
Cyt_bd_oxida_II [M=303]	0	48	1	depleted	1
Porin_1 [M=340]	0	49	1	depleted	1
G6PD_C [M=295]	0	49	1	depleted	1
Porph_ging [M=83]	0	49	1	depleted	1
HU-CCDC81_bac_2 [M=70]	0	49	1	depleted	1
PAD_porph [M=319]	0	50	1	depleted	1
Ig_2 [M=79]	0	49	1	depleted	1
GYF_2 [M=50]	0	49	1	depleted	1
LytR_cpsA_psr [M=152]	0	49	1	depleted	1
DUF1018 [M=118]	0	49	1	depleted	1
tRNA_NucTran2_2 [M=149]	0	49	1	depleted	1
LptE [M=107]	0	49	1	depleted	1
ICL [M=526]	0	49	1	depleted	1
UPF0061 [M=468]	0	49	1	depleted	1
DUF4406 [M=90]	1	107	1	depleted	1
Thioredoxin_9 [M=129]	0	51	1	depleted	1
Peptidase_C39_2 [M=144]	0	51	1	depleted	1
FIST [M=174]	0	50	1	depleted	1
DUF5653 [M=198]	0	51	1	depleted	1
GcrA [M=162]	0	51	1	depleted	1
PgpA [M=143]	0	51	1	depleted	1
DUF2303 [M=266]	0	51	1	depleted	1
Glyco_hydro2_C5 [M=103]	0	51	1	depleted	1
HSP33 [M=267]	0	50	1	depleted	1
LigT_PEase [M=87]	0	51	1	depleted	1
T2SSK [M=280]	0	51	1	depleted	1
DUF1730 [M=76]	0	51	1	depleted	1
BatD [M=91]	0	51	1	depleted	1
PNK3P [M=162]	0	51	1	depleted	1
HTH_33 [M=60]	0	51	1	depleted	1
Peptidase_M13 [M=205]	0	51	1	depleted	1
PilN [M=78]	0	51	1	depleted	1
DUF262 [M=221]	1	123	1	depleted	1
Methyltransf_4 [M=173]	1	158	1	depleted	1
MurB_C [M=120]	1	115	1	depleted	1
S-AdoMet_synt_M [M=120]	0	92	1	depleted	1
Glyco_hydro_1 [M=453]	0	92	1	depleted	1
Cytochrom_D1 [M=368]	0	91	1	depleted	1
Acetyltransf_9 [M=127]	0	91	1	depleted	1
STN [M=52]	0	91	1	depleted	1
Succ_CoA_lig [M=138]	0	91	1	depleted	1
ETF [M=181]	0	91	1	depleted	1
ABC1 [M=119]	0	91	1	depleted	1
Thioesterase [M=230]	0	91	1	depleted	1
DUF4440 [M=107]	0	91	1	depleted	1
ASCH [M=107]	0	91	1	depleted	1
CheR [M=195]	0	90	1	depleted	1
Complex1_30kDa [M=121]	0	90	1	depleted	1
Fer4_20 [M=112]	0	90	1	depleted	1
zf-IS66 [M=46]	0	90	1	depleted	1
MutS_I [M=113]	0	90	1	depleted	1
GAD [M=95]	0	90	1	depleted	1
Orn_Arg_deC_N [M=247]	1	180	1	depleted	1
OMP_b-brl_2 [M=180]	1	180	1	depleted	1
DUF3127 [M=85]	1	98	1	depleted	1
Ni_hydr_CYTB [M=182]	1	134	1	depleted	1
PA14 [M=147]	1	95	1	depleted	1
Phe_tRNA-synt_N [M=69]	0	92	1	depleted	1
Amidohydro_2 [M=288]	0	92	1	depleted	1
PAP2_3 [M=190]	1	134	1	depleted	1
MgtE_N [M=102]	0	92	1	depleted	1
DAGK_cat [M=126]	0	89	1	depleted	1
UPRTase [M=207]	0	89	1	depleted	1
DDE_Tnp_Tn3 [M=389]	0	89	1	depleted	1
OB_RNB [M=58]	0	89	1	depleted	1
Flavodoxin_1 [M=143]	0	89	1	depleted	1
Val_tRNA-synt_C [M=66]	0	92	1	depleted	1
Ala_racemase_C [M=125]	0	92	1	depleted	1
Cation_ATPase [M=91]	0	92	1	depleted	1
DDE_Tnp_IS66_C [M=39]	0	92	1	depleted	1
GTP1_OBG [M=155]	1	131	1	depleted	1
Glyco_hydro_43 [M=288]	1	134	1	depleted	1
Glyco_hydro_2_N [M=169]	1	170	1	depleted	1
Glyco_hydro_2_C [M=302]	1	144	1	depleted	1
Glyco_hydro_25 [M=178]	1	94	1	enriched	1
Glyco_hydro_2 [M=110]	1	129	1	depleted	1
GCV_H [M=122]	1	106	1	depleted	1
LemA [M=149]	1	147	1	depleted	1
LacI [M=46]	1	186	1	depleted	1
LTD [M=113]	1	173	1	depleted	1
FCD [M=125]	1	149	1	depleted	1
PEP-utilizers [M=73]	1	155	1	depleted	1
FA_hydroxylase [M=133]	1	115	1	depleted	1
Gp_dh_N [M=101]	1	140	1	depleted	1
Lactonase [M=344]	1	112	1	depleted	1
MlaD [M=81]	1	136	1	depleted	1
GFO_IDH_MocA_C [M=219]	1	171	1	depleted	1
Flg_bb_rod [M=31]	1	98	1	depleted	1
LDcluster4 [M=152]	1	172	1	depleted	1
PGI [M=486]	1	95	1	depleted	1
MutS_V [M=188]	1	155	1	depleted	1
FGGY_C [M=198]	1	132	1	depleted	1
Fe-S_biosyn [M=111]	1	130	1	depleted	1
GreA_GreB [M=77]	1	185	1	depleted	1
Flg_bbr_C [M=74]	1	123	1	depleted	1
GreA_GreB_N [M=71]	1	158	1	depleted	1
EF_TS [M=208]	1	132	1	depleted	1
Eco57I [M=106]	1	97	1	depleted	1
Epimerase_2 [M=346]	1	121	1	depleted	1
FecR [M=96]	1	154	1	depleted	1
GSHPx [M=108]	1	136	1	depleted	1
GSH-S_ATP [M=175]	1	100	1	depleted	1
Guanylate_cyc [M=183]	1	165	1	depleted	1
RecO_C [M=157]	0	76	1	depleted	1
Couple_hipA [M=99]	0	76	1	depleted	1
NQR2_RnfD_RnfE [M=293]	0	75	1	depleted	1
CoA_trans [M=217]	0	79	1	depleted	1
DUF4974 [M=70]	0	79	1	depleted	1
Peptidase_S9_N [M=414]	0	79	1	depleted	1
Lum_binding [M=87]	0	79	1	depleted	1
BatA [M=77]	0	79	1	depleted	1
Sigma54_DBD [M=160]	0	79	1	depleted	1
ATPgrasp_ST [M=278]	0	79	1	depleted	1
DAP_epimerase [M=121]	0	79	1	depleted	1
Kelch_3 [M=49]	0	79	1	depleted	1
GATase_4 [M=272]	0	78	1	depleted	1
DHBP_synthase [M=192]	0	78	1	depleted	1
Glyco_hydro_88 [M=344]	0	78	1	depleted	1
SQS_PSY [M=263]	0	78	1	depleted	1
DUF4124 [M=56]	0	78	1	depleted	1
MTHFR [M=287]	0	80	1	depleted	1
DapB_C [M=121]	0	80	1	depleted	1
Mem_trans [M=387]	0	82	1	depleted	1
RHH_1 [M=39]	0	81	1	depleted	1
TamB [M=383]	0	81	1	depleted	1
Beta-Casp [M=114]	0	82	1	depleted	1
SurA_N [M=118]	0	82	1	depleted	1
TonB_2 [M=85]	0	82	1	depleted	1
LpxK [M=327]	0	82	1	depleted	1
TMP-TENI [M=181]	0	79	1	depleted	1
bMG10 [M=130]	0	82	1	depleted	1
B12-binding_2 [M=75]	0	82	1	depleted	1
Glucokinase [M=316]	0	43	1	depleted	1
Amidoligase_2 [M=253]	0	82	1	depleted	1
Spermine_synth [M=188]	0	82	1	depleted	1
Arabinose_bd [M=185]	0	82	1	depleted	1
YbaB_DNA_bd [M=91]	0	80	1	depleted	1
NinB [M=131]	0	82	1	depleted	1
MarC [M=203]	0	79	1	depleted	1
YHS [M=47]	0	79	1	depleted	1
FAD_syn [M=158]	0	79	1	depleted	1
ThiS [M=77]	0	86	1	depleted	1
AAA_assoc_2 [M=81]	0	86	1	depleted	1
SHOCT [M=28]	0	86	1	depleted	1
3-dmu-9_3-mt [M=116]	0	87	1	depleted	1
GNVR [M=82]	0	87	1	depleted	1
AlbA_2 [M=122]	0	87	1	depleted	1
RecQ_Zn_bind [M=66]	0	86	1	depleted	1
NAD_Gly3P_dh_C [M=142]	0	87	1	depleted	1
S-methyl_trans [M=272]	0	87	1	depleted	1
HSDR_N_2 [M=110]	0	87	1	depleted	1
DprA_WH [M=61]	0	87	1	depleted	1
DNA_pol3_gamma3 [M=143]	0	88	1	depleted	1
PTS_EIIC [M=324]	0	88	1	depleted	1
PDT [M=183]	0	88	1	depleted	1
MnmE_helical [M=208]	0	87	1	depleted	1
PP_kinase_C_1 [M=167]	0	81	1	depleted	1
Methyltransf_2 [M=210]	0	86	1	depleted	1
FtsX_ECD [M=96]	0	86	1	depleted	1
MG2 [M=96]	0	79	1	depleted	1
SMC_ScpB [M=160]	0	79	1	depleted	1
Vut_1 [M=151]	0	79	1	depleted	1
NARP1 [M=515]	0	80	1	depleted	1
Fn3_assoc [M=59]	0	80	1	depleted	1
CPSase_sm_chain [M=128]	0	80	1	depleted	1
AdoHcyase [M=299]	0	86	1	depleted	1
GTP-bdg_M [M=79]	0	80	1	depleted	1
SMC_ScpA [M=241]	0	78	1	depleted	1
SBF [M=195]	0	82	1	depleted	1
PNPase [M=83]	0	83	1	depleted	1
Oxidored_q3 [M=144]	0	86	1	depleted	1
ANT [M=108]	0	86	1	depleted	1
MIP [M=227]	0	86	1	depleted	1
DbpA [M=72]	0	80	1	depleted	1
Methyltransf_3 [M=204]	0	88	1	depleted	1
Sulf_transp [M=310]	0	81	1	depleted	1
DsbC [M=120]	0	81	1	depleted	1
DUF4388 [M=94]	0	26	1	depleted	1
V4R [M=62]	0	26	1	depleted	1
RINGv [M=48]	0	26	1	depleted	1
AzlD [M=99]	0	26	1	depleted	1
zinc_ribbon_5 [M=37]	0	26	1	depleted	1
YjgF_endoribonc [M=148]	0	27	1	depleted	1
ParD_antitoxin [M=81]	0	27	1	depleted	1
YaeQ [M=173]	0	27	1	depleted	1
T2SS-T3SS_pil_N [M=72]	0	27	1	depleted	1
Glyco_hydro_30C [M=65]	0	27	1	depleted	1
Ppnp [M=92]	0	27	1	depleted	1
Exonuc_V_gamma [M=767]	0	27	1	depleted	1
Peptidase_M32 [M=488]	0	27	1	depleted	1
DUF2141 [M=112]	0	27	1	depleted	1
CobA_CobO_BtuR [M=172]	0	27	1	depleted	1
YacG [M=52]	0	27	1	depleted	1
DUF2721 [M=129]	0	27	1	depleted	1
UPF0149 [M=175]	0	27	1	depleted	1
GlcNAc_2-epim [M=346]	0	27	1	depleted	1
PEPCK_GTP [M=359]	0	27	1	depleted	1
IDH [M=734]	0	27	1	depleted	1
GT87 [M=240]	0	27	1	depleted	1
ChAPs [M=395]	0	27	1	depleted	1
DUF1351 [M=210]	0	26	1	depleted	1
DUF1364 [M=92]	0	27	1	depleted	1
YkuD_2 [M=169]	0	27	1	depleted	1
PurS [M=77]	0	27	1	depleted	1
TadE [M=43]	0	27	1	depleted	1
DUF2779 [M=126]	0	27	1	depleted	1
Fe_hyd_lg_C [M=243]	0	27	1	depleted	1
S1-P1_nuclease [M=255]	0	27	1	depleted	1
DUF4115 [M=74]	0	27	1	depleted	1
Bac_rhamnosid [M=102]	0	26	1	depleted	1
SHD1 [M=67]	0	26	1	depleted	1
PHB_acc [M=40]	0	26	1	depleted	1
OmpW [M=193]	0	26	1	depleted	1
PilW [M=126]	0	26	1	depleted	1
bPH_3 [M=95]	0	26	1	depleted	1
FtsL [M=97]	0	21	1	depleted	1
LapA_dom [M=64]	0	43	1	depleted	1
ProRS-C_1 [M=69]	0	43	1	depleted	1
Excalibur [M=38]	0	26	1	depleted	1
ASH [M=98]	0	80	1	depleted	1
ATP-grasp_2 [M=202]	0	81	1	depleted	1
Calx-beta [M=100]	0	81	1	depleted	1
1-cysPrx_C [M=40]	0	81	1	depleted	1
SH3_13 [M=65]	0	81	1	depleted	1
LpxD [M=70]	0	81	1	depleted	1
PriA_CRR [M=27]	0	81	1	depleted	1
CHB_HEX_C_1 [M=67]	0	81	1	depleted	1
Trns_repr_metal [M=77]	0	81	1	depleted	1
Peptidase_M6 [M=656]	0	26	1	depleted	1
DUF3037 [M=118]	0	26	1	depleted	1
Proton_antipo_C [M=243]	0	26	1	depleted	1
BMFP [M=77]	0	26	1	depleted	1
FlgN [M=146]	0	26	1	depleted	1
SKN1 [M=501]	0	26	1	depleted	1
eIF2A [M=194]	0	26	1	depleted	1
DUF1751 [M=99]	0	26	1	depleted	1
DUF1704 [M=365]	0	26	1	depleted	1
TfoX_N [M=91]	0	43	1	depleted	1
AIPR [M=295]	0	26	1	depleted	1
Pentaxin [M=194]	0	26	1	depleted	1
DUF5663 [M=86]	0	26	1	depleted	1
PilS [M=138]	0	26	1	depleted	1
Peptidase_M10_C [M=193]	0	26	1	depleted	1
CBAH [M=316]	0	26	1	depleted	1
Pectinesterase [M=298]	0	26	1	depleted	1
Phosphorylase [M=712]	0	88	1	depleted	1
Ppx-GppA [M=285]	0	88	1	depleted	1
Phasin_2 [M=100]	0	88	1	depleted	1
Kelch_5 [M=42]	0	77	1	depleted	1
EF-hand_8 [M=54]	0	77	1	depleted	1
SpoU_sub_bind [M=76]	0	77	1	depleted	1
PFOR_II [M=102]	0	77	1	depleted	1
SurE [M=195]	0	77	1	depleted	1
QRPTase_C [M=169]	0	77	1	depleted	1
ETF_alpha [M=84]	0	76	1	depleted	1
URO-D [M=346]	0	76	1	depleted	1
Sigma54_CBD [M=179]	0	76	1	depleted	1
Ser_hydrolase [M=171]	0	76	1	depleted	1
AstE_AspA [M=290]	0	76	1	depleted	1
TM1586_NiRdase [M=215]	0	76	1	depleted	1
Pro_dh [M=281]	0	74	1	depleted	1
Arginosuc_synth [M=388]	0	73	1	depleted	1
DNA_mis_repair [M=119]	0	78	1	depleted	1
PIN_3 [M=116]	0	72	1	depleted	1
MgtE [M=125]	0	71	1	depleted	1
Rad52_Rad22 [M=153]	0	71	1	depleted	1
GATase_5 [M=260]	0	71	1	depleted	1
Sigma70_r1_1 [M=82]	0	71	1	depleted	1
TRCF [M=95]	0	71	1	depleted	1
HPPK [M=111]	0	71	1	depleted	1
Kinase-like [M=288]	0	71	1	depleted	1
DUF2807 [M=181]	0	77	1	depleted	1
TrbI [M=187]	0	71	1	depleted	1
Trp_halogenase [M=454]	0	71	1	depleted	1
DUF1016_N [M=137]	0	71	1	depleted	1
Rnf-Nqr [M=174]	0	71	1	depleted	1
FA_synthesis [M=324]	0	71	1	depleted	1
FolB [M=111]	0	71	1	depleted	1
GARS_C [M=92]	0	71	1	depleted	1
Acetyltransf_5 [M=101]	0	71	1	depleted	1
SAF [M=63]	0	77	1	depleted	1
DNA_ligase_ZBD [M=27]	0	77	1	depleted	1
Glyco_hydro_92 [M=462]	0	77	1	depleted	1
ClpS [M=80]	0	74	1	depleted	1
Penicillinase_R [M=115]	0	74	1	depleted	1
DnaB_bind [M=56]	0	74	1	depleted	1
Esterase_PHB [M=219]	0	74	1	depleted	1
UCH [M=269]	0	75	1	depleted	1
PhaC_N [M=173]	0	75	1	depleted	1
Peptidase_M56 [M=299]	0	74	1	depleted	1
LptD_N [M=113]	0	75	1	depleted	1
KilA-N [M=112]	0	75	1	depleted	1
P22_Cro [M=60]	0	75	1	depleted	1
NifU_N [M=129]	0	75	1	depleted	1
ACT_7 [M=65]	0	75	1	depleted	1
COX2_TM [M=89]	0	75	1	depleted	1
CinA [M=155]	0	75	1	depleted	1
A2M [M=92]	0	75	1	depleted	1
Smr [M=80]	0	70	1	depleted	1
NIR_SIR [M=159]	0	74	1	depleted	1
PDH [M=258]	0	74	1	depleted	1
PrmC_N [M=71]	0	77	1	depleted	1
GcpE [M=351]	0	77	1	depleted	1
Rho_RNA_bind [M=73]	0	77	1	depleted	1
Homoserine_dh [M=173]	0	77	1	depleted	1
PilJ [M=114]	0	77	1	depleted	1
Voltage_CLC [M=354]	0	77	1	depleted	1
Bax1-I [M=207]	0	74	1	depleted	1
TrkH [M=502]	0	77	1	depleted	1
PP_kinase [M=202]	0	78	1	depleted	1
YCII [M=95]	0	76	1	depleted	1
Gp49 [M=90]	0	74	1	depleted	1
Porin_4 [M=312]	0	76	1	depleted	1
Oxidored_q4 [M=99]	0	76	1	depleted	1
FixG_C [M=119]	0	74	1	depleted	1
Y2_Tnp [M=183]	0	78	1	depleted	1
Big_2 [M=79]	0	70	1	depleted	1
YhcG_C [M=155]	0	70	1	depleted	1
Bac_export_2 [M=330]	0	70	1	depleted	1
GIIM [M=80]	0	84	1	depleted	1
AIRC [M=148]	0	84	1	depleted	1
GTP-bdg_N [M=89]	0	84	1	depleted	1
LpxB [M=374]	0	84	1	depleted	1
PriA_C [M=94]	0	85	1	depleted	1
AICARFT_IMPCHas [M=310]	0	85	1	depleted	1
S6PP [M=247]	0	84	1	depleted	1
DUF853 [M=504]	0	85	1	depleted	1
MR_MLE_N [M=117]	0	85	1	depleted	1
TPMT [M=218]	0	85	1	depleted	1
Toprim_C_rpt [M=56]	0	85	1	depleted	1
ArsC [M=64]	0	85	1	depleted	1
IclR [M=129]	0	89	1	depleted	1
POTRA_1 [M=69]	0	78	1	depleted	1
DUF1800 [M=433]	0	85	1	depleted	1
NIR_SIR_ferr [M=69]	0	78	1	depleted	1
DUF192 [M=96]	0	84	1	depleted	1
GDC-P [M=430]	0	84	1	depleted	1
RNA_pol [M=426]	0	86	1	depleted	1
ThiG [M=247]	0	83	1	depleted	1
DUF5011 [M=71]	0	86	1	depleted	1
Peptidase_M42 [M=292]	0	85	1	depleted	1
DALR_2 [M=63]	0	83	1	depleted	1
SpaA [M=69]	0	83	1	depleted	1
SusD-like [M=496]	0	84	1	depleted	1
ABC-3 [M=258]	0	83	1	depleted	1
MORN_2 [M=22]	0	83	1	depleted	1
LpxC [M=268]	0	83	1	depleted	1
bPH_2 [M=80]	0	83	1	depleted	1
UPF0176_N [M=92]	0	83	1	depleted	1
tRNA_anti_2 [M=95]	0	83	1	depleted	1
PTCB-BRCT [M=63]	0	84	1	depleted	1
Microtub_bd [M=155]	0	83	1	depleted	1
Glyco_hydro_65m [M=387]	0	26	1	depleted	1
DUF305 [M=152]	0	72	1	depleted	1
Sulfotransfer_3 [M=217]	0	72	1	depleted	1
PhoU [M=89]	0	73	1	depleted	1
Prim_Zn_Ribbon [M=38]	0	73	1	depleted	1
GMP_synt_C [M=92]	0	73	1	depleted	1
MutL_C [M=147]	0	73	1	depleted	1
AXE1 [M=318]	0	72	1	depleted	1
NadA [M=298]	0	73	1	depleted	1
Asparaginase [M=191]	0	73	1	depleted	1
CheB_methylest [M=170]	0	72	1	depleted	1
DDE_5 [M=273]	0	70	1	depleted	1
Sortase [M=125]	0	70	1	depleted	1
Peptidase_M13_N [M=382]	0	70	1	depleted	1
SnoaL_3 [M=121]	0	70	1	depleted	1
YajC [M=80]	0	70	1	depleted	1
Zn_Tnp_IS91 [M=91]	0	70	1	depleted	1
POTRA_2 [M=76]	0	71	1	depleted	1
p450 [M=463]	0	72	1	depleted	1
GARS_N [M=90]	0	73	1	depleted	1
EVE [M=145]	0	73	1	depleted	1
PDDEXK_3 [M=118]	0	72	1	depleted	1
Tyr_Deacylase [M=144]	0	72	1	depleted	1
VanZ [M=125]	0	72	1	depleted	1
Ferrochelatase [M=317]	0	72	1	depleted	1
MBOAT [M=348]	0	72	1	depleted	1
GFO_IDH_MocA_C2 [M=254]	0	72	1	depleted	1
Exonuc_VII_S [M=52]	0	73	1	depleted	1
Ribosomal_L30 [M=51]	0	72	1	depleted	1
Cu-oxidase_4 [M=235]	0	73	1	depleted	1
CP_ATPgrasp_2 [M=375]	0	73	1	depleted	1
OppC_N [M=51]	0	73	1	depleted	1
GST_C_3 [M=99]	0	73	1	depleted	1
RNA_pol_Rpb6 [M=48]	0	73	1	depleted	1
PP_kinase_C [M=172]	0	73	1	depleted	1
Glyco_hydro_31 [M=443]	0	72	1	depleted	1
HgmA [M=426]	0	43	1	depleted	1
DUF948 [M=89]	0	31	1	depleted	1
SUA5 [M=135]	0	43	1	depleted	1
DUF3524 [M=168]	0	1	1	depleted	1
DUF2947 [M=152]	0	1	1	depleted	1
DUF2935 [M=121]	0	1	1	depleted	1
DUF2929 [M=56]	0	1	1	depleted	1
DUF357 [M=73]	0	1	1	depleted	1
Yippee-Mis18 [M=105]	0	1	1	depleted	1
DUF359 [M=122]	0	1	1	depleted	1
DUF3591 [M=442]	0	1	1	depleted	1
YjzC [M=55]	0	1	1	depleted	1
DUF2969 [M=71]	0	1	1	depleted	1
ABA_GPCR [M=182]	0	1	1	depleted	1
DUF3437 [M=88]	0	1	1	depleted	1
YokU [M=87]	0	1	1	depleted	1
YojJ [M=69]	0	1	1	depleted	1
DUF3017 [M=74]	0	1	1	depleted	1
DpnII-MboI [M=150]	0	1	1	depleted	1
DUF1206 [M=70]	0	1	1	depleted	1
PyrBI_leader [M=44]	0	2	1	depleted	1
Phage_holin_7_1 [M=133]	0	2	1	depleted	1
ERG4_ERG24 [M=432]	0	2	1	depleted	1
DUF3158 [M=156]	0	2	1	depleted	1
DUF5617 [M=96]	0	2	1	depleted	1
DUF5616 [M=140]	0	2	1	depleted	1
DUF3523 [M=265]	0	1	1	depleted	1
DUF5609 [M=65]	0	2	1	depleted	1
CsiD [M=294]	0	2	1	depleted	1
Cse1 [M=370]	0	2	1	depleted	1
DUF5591 [M=152]	0	2	1	depleted	1
HTH_54 [M=92]	0	2	1	depleted	1
HTH_15 [M=74]	0	2	1	depleted	1
DUF1720 [M=75]	0	1	1	depleted	1
DUF560 [M=288]	0	2	1	depleted	1
DUF3522 [M=187]	0	1	1	depleted	1
DUF3502 [M=130]	0	1	1	depleted	1
DUF3499 [M=124]	0	1	1	depleted	1
VRP1 [M=322]	0	1	1	depleted	1
VRP3 [M=240]	0	1	1	depleted	1
DUF4817 [M=55]	0	1	1	depleted	1
DUF2399 [M=152]	0	1	1	depleted	1
DUF5001 [M=86]	0	1	1	depleted	1
DUF424 [M=92]	0	1	1	depleted	1
VPS9 [M=104]	0	1	1	depleted	1
XRCC1_N [M=148]	0	1	1	depleted	1
YlmH_RBD [M=84]	0	1	1	depleted	1
DUF3402 [M=462]	0	1	1	depleted	1
DUF3397 [M=112]	0	1	1	depleted	1
YmcE_antitoxin [M=76]	0	1	1	depleted	1
bHLH-MYC_N [M=176]	0	1	1	depleted	1
DUF2986 [M=43]	0	1	1	depleted	1
DUF3421 [M=115]	0	1	1	depleted	1
DUF2732 [M=74]	0	2	1	depleted	1
DUF4821 [M=264]	0	1	1	depleted	1
DUF4823 [M=141]	0	1	1	depleted	1
DUF3484 [M=68]	0	1	1	depleted	1
DUF347 [M=52]	0	1	1	depleted	1
DUF3461 [M=125]	0	1	1	depleted	1
DUF3454 [M=64]	0	1	1	depleted	1
DUF3449 [M=191]	0	1	1	depleted	1
DUF2955 [M=140]	0	1	1	depleted	1
DUF4822 [M=123]	0	1	1	depleted	1
DUF3339 [M=67]	0	1	1	depleted	1
DUF3013 [M=160]	0	1	1	depleted	1
DUF2999 [M=82]	0	1	1	depleted	1
DUF4826 [M=128]	0	1	1	depleted	1
DUF2316 [M=89]	0	1	1	depleted	1
DUF2398 [M=365]	0	1	1	depleted	1
VPDSG-CTERM [M=26]	0	1	1	depleted	1
ABATE [M=127]	0	1	1	depleted	1
YmgB [M=59]	0	1	1	depleted	1
DUF2717 [M=77]	0	2	1	depleted	1
DUF1852 [M=323]	0	2	1	depleted	1
DUF5419 [M=54]	0	2	1	depleted	1
HU-CCDC81_euk_2 [M=75]	0	2	1	depleted	1
PROCN [M=407]	0	2	1	depleted	1
PutA_N [M=113]	0	2	1	depleted	1
Cullin_binding [M=120]	0	2	1	depleted	1
Phe_hydrox_dim [M=167]	0	2	1	depleted	1
CAP_assoc_N [M=140]	0	2	1	depleted	1
DUF2755 [M=100]	0	2	1	depleted	1
DUF2754 [M=70]	0	2	1	depleted	1
PMEI [M=155]	0	2	1	depleted	1
DUF2750 [M=102]	0	2	1	depleted	1
PNKP_ligase [M=320]	0	2	1	depleted	1
PNPase_C [M=37]	0	2	1	depleted	1
DUF2748 [M=438]	0	2	1	depleted	1
RACo_linker [M=85]	0	2	1	depleted	1
PhnJ [M=275]	0	2	1	depleted	1
RACo_C_ter [M=259]	0	2	1	depleted	1
PriC [M=174]	0	2	1	depleted	1
Plus-3 [M=109]	0	2	1	depleted	1
CD36 [M=465]	0	2	1	depleted	1
Ploopntkinase2 [M=298]	0	2	1	depleted	1
ProQ_C [M=51]	0	2	1	depleted	1
DUF2004 [M=106]	0	2	1	depleted	1
CppA_C [M=103]	0	2	1	depleted	1
DUF2508 [M=71]	0	2	1	depleted	1
DUF2148 [M=68]	0	2	1	depleted	1
CDH [M=224]	0	2	1	depleted	1
PT-TG [M=69]	0	2	1	depleted	1
CEP63 [M=269]	0	2	1	depleted	1
DUF2744 [M=118]	0	2	1	depleted	1
CFAP91 [M=154]	0	2	1	depleted	1
Peptidase_C65 [M=246]	0	2	1	depleted	1
H_kinase_N [M=144]	0	2	1	depleted	1
HeH [M=35]	0	2	1	depleted	1
CpXC [M=118]	0	2	1	depleted	1
DUF5699 [M=61]	0	2	1	depleted	1
CpxA_peri [M=134]	0	2	1	depleted	1
DUF2737 [M=53]	0	2	1	depleted	1
DUF5476 [M=62]	0	2	1	depleted	1
Crl [M=128]	0	2	1	depleted	1
PRO8NT [M=152]	0	2	1	depleted	1
GvpG [M=80]	0	2	1	depleted	1
DUF2428 [M=276]	0	2	1	depleted	1
DUF2703 [M=120]	0	2	1	depleted	1
CENP-Q [M=168]	0	2	1	depleted	1
PPR_long [M=212]	0	2	1	depleted	1
Band_3_cyto [M=268]	0	2	1	depleted	1
BamHI [M=157]	0	2	1	depleted	1
DUF2715 [M=176]	0	2	1	depleted	1
DUF2695 [M=53]	0	2	1	depleted	1
DUF1851 [M=75]	0	2	1	depleted	1
GvpD [M=484]	0	2	1	depleted	1
Gpi1 [M=187]	0	2	1	depleted	1
DUF5403 [M=96]	0	2	1	depleted	1
DUF5334 [M=71]	0	2	1	depleted	1
DUF5466 [M=57]	0	2	1	depleted	1
HTHP [M=72]	0	2	1	depleted	1
HR_lesion [M=138]	0	2	1	depleted	1
DUF5640 [M=84]	0	2	1	depleted	1
DUF5719 [M=319]	0	2	1	depleted	1
DUF5770 [M=131]	0	2	1	depleted	1
DUF5760 [M=86]	0	2	1	depleted	1
DUF5759 [M=71]	0	2	1	depleted	1
DUF5757 [M=94]	0	2	1	depleted	1
Glyco_transf_7N [M=134]	0	2	1	depleted	1
DUF5722 [M=394]	0	2	1	depleted	1
Cys_rich_CPCC [M=75]	0	2	1	depleted	1
DUF5764 [M=134]	0	2	1	depleted	1
DUF2756 [M=104]	0	2	1	depleted	1
YndJ [M=261]	0	1	1	depleted	1
DUF3385 [M=161]	0	1	1	depleted	1
DUF2590 [M=100]	0	1	1	depleted	1
DUF4250 [M=55]	0	1	1	depleted	1
DUF4259 [M=136]	0	1	1	depleted	1
DUF4261 [M=77]	0	1	1	depleted	1
DUF2583 [M=88]	0	1	1	depleted	1
SpoVT_C [M=128]	0	6	1	depleted	1
Wtap [M=155]	0	1	1	depleted	1
Whirly [M=137]	0	1	1	depleted	1
DUF2574 [M=93]	0	1	1	depleted	1
DUF4304 [M=116]	0	1	1	depleted	1
pEK499_p136 [M=152]	0	1	1	depleted	1
DUF4366 [M=144]	0	1	1	depleted	1
DUF4360 [M=178]	0	1	1	depleted	1
DUF436 [M=171]	0	1	1	depleted	1
DUF4892 [M=183]	0	1	1	depleted	1
DUF4354 [M=125]	0	1	1	depleted	1
UxaE [M=475]	0	1	1	depleted	1
DUF432 [M=123]	0	1	1	depleted	1
WaaY [M=229]	0	1	1	depleted	1
WRC [M=43]	0	1	1	depleted	1
DUF4539 [M=86]	0	1	1	depleted	1
DUF2475 [M=67]	0	1	1	depleted	1
DUF2470 [M=77]	0	1	1	depleted	1
hEGF [M=22]	0	1	1	depleted	1
DUF2273 [M=48]	0	1	1	depleted	1
DUF4906 [M=203]	0	1	1	depleted	1
DUF228 [M=183]	0	1	1	depleted	1
DUF4905 [M=83]	0	1	1	depleted	1
UvsW [M=56]	0	1	1	depleted	1
DUF4903 [M=190]	0	1	1	depleted	1
DUF2285 [M=107]	0	1	1	depleted	1
DUF4913 [M=105]	0	1	1	depleted	1
DUF4245 [M=166]	0	1	1	depleted	1
XLF [M=177]	0	1	1	depleted	1
XOO_2897-deam [M=101]	0	1	1	depleted	1
DUF241 [M=234]	0	1	1	depleted	1
DUF4760 [M=142]	0	1	1	depleted	1
DUF4752 [M=84]	0	1	1	depleted	1
6PF2K [M=223]	0	1	1	depleted	1
DUF4744 [M=72]	0	1	1	depleted	1
DUF4667 [M=226]	0	1	1	depleted	1
VWA_3_C [M=47]	0	1	1	depleted	1
DUF4651 [M=61]	0	1	1	depleted	1
Vac_ImportDeg [M=162]	0	1	1	depleted	1
tRNA-Thr_ED [M=137]	0	1	1	depleted	1
DUF4635 [M=134]	0	1	1	depleted	1
DUF2433 [M=124]	0	1	1	depleted	1
ssDNA-exonuc_C [M=202]	0	1	1	depleted	1
53-BP1_Tudor [M=122]	0	1	1	depleted	1
VacA2 [M=60]	0	1	1	depleted	1
mTERF [M=314]	0	1	1	depleted	1
DUF2406 [M=63]	0	1	1	depleted	1
DUF4763 [M=244]	0	1	1	depleted	1
XPA_C [M=51]	0	1	1	depleted	1
XPA_N [M=32]	0	1	1	depleted	1
XPC-binding [M=57]	0	1	1	depleted	1
DUF2559 [M=54]	0	1	1	depleted	1
DUF4311 [M=212]	0	1	1	depleted	1
DUF4315 [M=81]	0	1	1	depleted	1
DUF2401 [M=228]	0	1	1	depleted	1
mRNA_triPase [M=221]	0	1	1	depleted	1
WD40_3 [M=57]	0	1	1	depleted	1
WEMBL [M=562]	0	1	1	depleted	1
DUF4833 [M=138]	0	1	1	depleted	1
V-ATPase_G_2 [M=104]	0	1	1	depleted	1
DUF2288 [M=91]	0	1	1	depleted	1
VHP [M=36]	0	1	1	depleted	1
DUF4361 [M=143]	0	1	1	depleted	1
YniB [M=166]	0	1	1	depleted	1
DUF2556 [M=53]	0	1	1	depleted	1
DUF4336 [M=319]	0	1	1	depleted	1
DUF3284 [M=120]	0	1	1	depleted	1
DUF3325 [M=101]	0	1	1	depleted	1
DUF3080 [M=316]	0	1	1	depleted	1
DUF4064 [M=103]	0	1	1	depleted	1
DUF4073 [M=157]	0	1	1	depleted	1
DUF4081 [M=105]	0	1	1	depleted	1
DUF4083 [M=57]	0	1	1	depleted	1
DUF4092 [M=176]	0	1	1	depleted	1
DUF4093 [M=83]	0	1	1	depleted	1
DUF4120 [M=95]	0	1	1	depleted	1
DUF2688 [M=56]	0	1	1	depleted	1
DUF4168 [M=90]	0	1	1	depleted	1
DUF4170 [M=68]	0	1	1	depleted	1
DUF4174 [M=120]	0	1	1	depleted	1
YEATS [M=81]	0	1	1	depleted	1
DUF4176 [M=74]	0	1	1	depleted	1
DUF4179 [M=90]	0	1	1	depleted	1
DUF2382 [M=111]	0	1	1	depleted	1
DUF3027 [M=193]	0	1	1	depleted	1
YvbH_ext [M=61]	0	1	1	depleted	1
DUF3261 [M=137]	0	1	1	depleted	1
DUF3258 [M=99]	0	1	1	depleted	1
DUF3255 [M=123]	0	1	1	depleted	1
DUF3077 [M=77]	0	1	1	depleted	1
DUF3087 [M=169]	0	1	1	depleted	1
YscK [M=209]	0	1	1	depleted	1
DUF3232 [M=152]	0	1	1	depleted	1
DUF3280 [M=137]	0	1	1	depleted	1
DUF3600 [M=160]	0	1	1	depleted	1
DUF3601 [M=77]	0	1	1	depleted	1
bZIP_2 [M=54]	0	1	1	depleted	1
DUF309 [M=59]	0	1	1	depleted	1
DUF3187 [M=320]	0	1	1	depleted	1
DUF3185 [M=59]	0	1	1	depleted	1
YycI [M=231]	0	1	1	depleted	1
DUF3042 [M=54]	0	1	1	depleted	1
DUF3303 [M=90]	0	1	1	depleted	1
AAA_lid_7 [M=107]	0	1	1	depleted	1
DUF3073 [M=63]	0	1	1	depleted	1
bPH_5 [M=100]	0	1	1	depleted	1
DUF4044 [M=33]	0	1	1	depleted	1
ZoocinA_TRD [M=106]	0	1	1	depleted	1
tRNA-synt_2_TM [M=217]	0	1	1	depleted	1
WH2 [M=30]	0	1	1	depleted	1
p25-alpha [M=155]	0	1	1	depleted	1
DUF4520 [M=91]	0	1	1	depleted	1
ocr [M=101]	0	1	1	depleted	1
DUF434 [M=56]	0	1	1	depleted	1
WW [M=31]	0	1	1	depleted	1
DUF4839 [M=123]	0	1	1	depleted	1
DUF2550 [M=127]	0	1	1	depleted	1
DUF3040 [M=84]	0	1	1	depleted	1
DUF3222 [M=75]	0	1	1	depleted	1
DUF3097 [M=271]	0	1	1	depleted	1
DUF3180 [M=135]	0	1	1	depleted	1
DUF3099 [M=72]	0	1	1	depleted	1
DUF31 [M=373]	0	1	1	depleted	1
DUF3172 [M=139]	0	1	1	depleted	1
DUF3159 [M=188]	0	1	1	depleted	1
YqbF [M=43]	0	1	1	depleted	1
ZirS_C [M=145]	0	1	1	depleted	1
DUF3100 [M=235]	0	1	1	depleted	1
DUF3142 [M=223]	0	1	1	depleted	1
DUF3126 [M=63]	0	1	1	depleted	1
DUF3117 [M=50]	0	1	1	depleted	1
DUF3093 [M=140]	0	1	1	depleted	1
DUF3198 [M=50]	0	1	1	depleted	1
DUF3145 [M=157]	0	1	1	depleted	1
RAMP4 [M=60]	0	2	1	depleted	1
PhoQ_Sensor [M=179]	0	2	1	depleted	1
DUF2766 [M=79]	0	2	1	depleted	1
Phageshock_PspD [M=61]	0	2	1	depleted	1
DUF2835 [M=71]	0	2	1	depleted	1
PIH1_CS [M=99]	0	2	1	depleted	1
DUF2294 [M=111]	0	2	1	depleted	1
Bud13 [M=143]	0	2	1	depleted	1
DUF1713 [M=33]	0	2	1	depleted	1
DUF3095 [M=377]	0	2	1	depleted	1
DUF1451 [M=147]	0	2	1	depleted	1
DUF2868 [M=319]	0	2	1	depleted	1
RE_AlwI [M=451]	0	2	1	depleted	1
CLAMP [M=99]	0	2	1	depleted	1
BsuBI_PstI_RE_N [M=141]	0	2	1	depleted	1
DUF2293 [M=85]	0	2	1	depleted	1
COX4_pro_2 [M=46]	0	2	1	depleted	1
DUF1454 [M=190]	0	2	1	depleted	1
DUF2913 [M=207]	0	2	1	depleted	1
DUF2140 [M=187]	0	1	1	depleted	1
DUF5618 [M=123]	0	1	1	depleted	1
USP8_interact [M=179]	0	1	1	depleted	1
DUF5621 [M=140]	0	1	1	depleted	1
DUF5108 [M=216]	0	1	1	depleted	1
DUF5626 [M=121]	0	1	1	depleted	1
UNC-93 [M=157]	0	1	1	depleted	1
DUF1749 [M=299]	0	2	1	depleted	1
DUF2206 [M=380]	0	1	1	depleted	1
Phage_holin_T [M=216]	0	2	1	depleted	1
DUF5590 [M=45]	0	1	1	depleted	1
UPF0086 [M=87]	0	1	1	depleted	1
DUF5711 [M=344]	0	1	1	depleted	1
zf-C3HC [M=133]	0	1	1	depleted	1
DUF5695 [M=857]	0	1	1	depleted	1
DUF5062 [M=83]	0	1	1	depleted	1
DUF1419 [M=112]	0	2	1	depleted	1
DUF2838 [M=111]	0	2	1	depleted	1
PI3K_P85_iSH2 [M=161]	0	2	1	depleted	1
UBX [M=81]	0	1	1	depleted	1
DUF5700 [M=283]	0	1	1	depleted	1
DUF2218 [M=88]	0	1	1	depleted	1
DUF5049 [M=57]	0	1	1	depleted	1
DUF5053 [M=59]	0	1	1	depleted	1
DUF5024 [M=104]	0	1	1	depleted	1
DUF5701 [M=194]	0	1	1	depleted	1
DUF5052 [M=199]	0	1	1	depleted	1
DUF5673 [M=66]	0	1	1	depleted	1
DUF5012 [M=125]	0	1	1	depleted	1
zf-C3H2C3 [M=35]	0	1	1	depleted	1
uDENN [M=66]	0	1	1	depleted	1
DUF5034 [M=161]	0	1	1	depleted	1
DUF2118 [M=151]	0	1	1	depleted	1
UCR_hinge [M=66]	0	1	1	depleted	1
DUF2194 [M=692]	0	1	1	depleted	1
DUF5717_N [M=875]	0	1	1	depleted	1
DUF2129 [M=70]	0	1	1	depleted	1
REPA_OB_2 [M=98]	0	2	1	depleted	1
DUF2124 [M=141]	0	1	1	depleted	1
DUF5384 [M=145]	0	1	1	depleted	1
DUF5693 [M=610]	0	1	1	depleted	1
Ubiquitin_4 [M=89]	0	1	1	depleted	1
DUF2209 [M=121]	0	1	1	depleted	1
DUF503 [M=88]	0	1	1	depleted	1
DUF5650 [M=55]	0	1	1	depleted	1
DUF2138 [M=552]	0	1	1	depleted	1
DUF5043 [M=156]	0	1	1	depleted	1
UBA_2 [M=46]	0	1	1	depleted	1
DUF5709 [M=49]	0	1	1	depleted	1
DUF5033 [M=178]	0	1	1	depleted	1
DUF5713 [M=107]	0	1	1	depleted	1
zf-4CXXC_R1 [M=99]	0	1	1	depleted	1
DUF2509 [M=131]	0	2	1	depleted	1
DUF5114 [M=88]	0	1	1	depleted	1
DUF5345 [M=77]	0	1	1	depleted	1
DUF5405 [M=94]	0	1	1	depleted	1
UPF0223 [M=86]	0	1	1	depleted	1
DUF5431 [M=70]	0	1	1	depleted	1
DUF1380 [M=137]	0	1	1	depleted	1
DUF5360 [M=127]	0	1	1	depleted	1
DUF5347 [M=102]	0	1	1	depleted	1
zf-C2H2_2 [M=101]	0	1	1	depleted	1
DUF2840 [M=148]	0	2	1	depleted	1
DUF2861 [M=267]	0	2	1	depleted	1
DUF2517 [M=61]	0	2	1	depleted	1
PUD [M=97]	0	2	1	depleted	1
PUL [M=276]	0	2	1	depleted	1
DUF2623 [M=93]	0	2	1	depleted	1
Binary_toxB [M=78]	0	2	1	depleted	1
DUF2145 [M=200]	0	2	1	depleted	1
DUF2606 [M=130]	0	2	1	depleted	1
CBM39 [M=108]	0	2	1	depleted	1
Phageshock_PspG [M=64]	0	2	1	depleted	1
ParG [M=76]	0	2	1	depleted	1
DUF2589 [M=152]	0	2	1	depleted	1
ParD [M=80]	0	2	1	depleted	1
Prominin [M=799]	0	2	1	depleted	1
Propeptide_C1 [M=40]	0	2	1	depleted	1
zf-3CxxC [M=100]	0	1	1	depleted	1
CBM_1 [M=29]	0	2	1	depleted	1
DUF2593 [M=141]	0	2	1	depleted	1
DUF1957 [M=101]	0	2	1	depleted	1
DUF2597 [M=134]	0	2	1	depleted	1
Pacifastin_I [M=40]	0	2	1	depleted	1
Protein_K [M=56]	0	2	1	depleted	1
PWWP [M=96]	0	2	1	depleted	1
DUF2496 [M=43]	0	2	1	depleted	1
UPF0182 [M=757]	0	1	1	depleted	1
DUF2178 [M=106]	0	1	1	depleted	1
DUF5455 [M=102]	0	1	1	depleted	1
DUF3107 [M=73]	0	1	1	depleted	1
DUF5477 [M=77]	0	1	1	depleted	1
DUF2195 [M=117]	0	1	1	depleted	1
DUF5592 [M=89]	0	1	1	depleted	1
UPF0302 [M=105]	0	1	1	depleted	1
DUF5329 [M=93]	0	1	1	depleted	1
DUF5643 [M=115]	0	1	1	depleted	1
DUF5325 [M=61]	0	1	1	depleted	1
zf-C2H2_3rep [M=126]	0	1	1	depleted	1
DUF2161 [M=118]	0	1	1	depleted	1
DUF5610 [M=118]	0	1	1	depleted	1
DUF5302 [M=52]	0	1	1	depleted	1
UPF0560 [M=820]	0	1	1	depleted	1
DUF5130 [M=136]	0	1	1	depleted	1
DUF5597 [M=133]	0	1	1	depleted	1
UPF0669 [M=185]	0	1	1	depleted	1
UEV [M=121]	0	1	1	depleted	1
DUF512 [M=199]	0	1	1	depleted	1
DUF5465 [M=19]	0	1	1	depleted	1
DUF5471 [M=70]	0	1	1	depleted	1
UPF0158 [M=157]	0	1	1	depleted	1
DUF5718 [M=250]	0	1	1	depleted	1
DUF5480 [M=71]	0	1	1	depleted	1
DUF5397 [M=64]	0	1	1	depleted	1
DUF1290 [M=86]	0	1	1	depleted	1
UPF0147 [M=81]	0	1	1	depleted	1
DUF2165 [M=157]	0	1	1	depleted	1
DUF5394 [M=219]	0	1	1	depleted	1
DUF5484 [M=43]	0	1	1	depleted	1
DUF5510 [M=62]	0	1	1	depleted	1
DUF5516 [M=37]	0	1	1	depleted	1
UPF0113_N [M=83]	0	1	1	depleted	1
UPF0137 [M=237]	0	1	1	depleted	1
Peptidase_C97 [M=151]	0	2	1	depleted	1
DUF4964 [M=88]	0	2	1	depleted	1
Cobalamin_bind [M=320]	0	2	1	depleted	1
Fib_alpha [M=143]	0	2	1	depleted	1
Fer4_23 [M=82]	0	2	1	depleted	1
DNA_pol3_tau_4 [M=80]	0	2	1	depleted	1
DNA_primase_lrg [M=266]	0	2	1	depleted	1
Dot_icm_IcmQ [M=179]	0	2	1	depleted	1
DNase_NucA_NucB [M=113]	0	2	1	depleted	1
DUF1202 [M=307]	0	2	1	depleted	1
DUF1192 [M=58]	0	2	1	depleted	1
DR2241 [M=111]	0	2	1	depleted	1
FWWh [M=147]	0	2	1	depleted	1
DUF1054 [M=198]	0	2	1	depleted	1
FUN14 [M=92]	0	2	1	depleted	1
E1_4HB [M=70]	0	2	1	depleted	1
FPP [M=868]	0	2	1	depleted	1
DUF1188 [M=248]	0	2	1	depleted	1
DSRB [M=61]	0	2	1	depleted	1
E3_UbLigase_R4 [M=813]	0	2	1	depleted	1
DUF123 [M=95]	0	2	1	depleted	1
Fip1 [M=43]	0	2	1	depleted	1
GP38 [M=260]	0	2	1	depleted	1
DUF881 [M=145]	0	2	1	depleted	1
DUF1281 [M=179]	0	2	1	depleted	1
GSH_synth_ATP [M=382]	0	2	1	depleted	1
Dynamitin [M=402]	0	2	1	depleted	1
GST_C_4 [M=117]	0	2	1	depleted	1
DUF763 [M=311]	0	2	1	depleted	1
EcoRII-N [M=154]	0	2	1	depleted	1
EF-hand_13 [M=90]	0	2	1	depleted	1
EcoRI [M=257]	0	2	1	depleted	1
ELMO_CED12 [M=173]	0	2	1	depleted	1
FBP_C [M=155]	0	2	1	depleted	1
DUF778 [M=189]	0	2	1	depleted	1
FAD-SLDH [M=162]	0	2	1	depleted	1
DUF1059 [M=56]	0	2	1	depleted	1
EF1_GNE [M=90]	0	2	1	depleted	1
DUF2358 [M=113]	0	2	1	depleted	1
CEP19 [M=165]	0	2	1	depleted	1
DUF1836 [M=105]	0	2	1	depleted	1
PSS [M=273]	0	2	1	depleted	1
DUF2474 [M=39]	0	2	1	depleted	1
PSI [M=51]	0	2	1	depleted	1
DUF2170 [M=137]	0	2	1	depleted	1
CBF [M=169]	0	2	1	depleted	1
PsiA [M=237]	0	2	1	depleted	1
DUF2441 [M=141]	0	2	1	depleted	1
BofA [M=75]	0	2	1	depleted	1
Phospholip_A2_3 [M=111]	0	2	1	depleted	1
Psu [M=174]	0	2	1	depleted	1
CASP_C [M=252]	0	2	1	depleted	1
Photo_RC [M=260]	0	2	1	depleted	1
Glutaredoxin2_C [M=130]	0	2	1	depleted	1
DUF1771 [M=64]	0	2	1	depleted	1
DUF1772 [M=137]	0	2	1	depleted	1
EPTP [M=43]	0	2	1	depleted	1
DUF1129 [M=207]	0	2	1	depleted	1
EMG1 [M=205]	0	2	1	depleted	1
DUF1145 [M=58]	0	2	1	depleted	1
DUF2554 [M=76]	0	2	1	depleted	1
Cullin [M=619]	0	2	1	depleted	1
PIN_8 [M=227]	0	2	1	depleted	1
DUF5696 [M=611]	0	2	1	depleted	1
DUF1805 [M=63]	0	2	1	depleted	1
DUF2794 [M=85]	0	2	1	depleted	1
DUF1802 [M=175]	0	2	1	depleted	1
DUF2810 [M=53]	0	2	1	depleted	1
DUF2390 [M=106]	0	2	1	depleted	1
BpuJI_N [M=278]	0	2	1	depleted	1
DUF2785 [M=174]	0	2	1	depleted	1
FidL_like [M=90]	0	2	1	depleted	1
DUF1152 [M=295]	0	2	1	depleted	1
DUF108 [M=89]	0	2	1	depleted	1
IIGP [M=375]	0	2	1	depleted	1
IML1 [M=286]	0	2	1	depleted	1
CodY [M=177]	0	2	1	depleted	1
DUF5109 [M=114]	0	2	1	depleted	1
KaiB [M=82]	0	2	1	depleted	1
IlvB_leader [M=32]	0	2	1	depleted	1
DUF4972 [M=128]	0	2	1	depleted	1
Glyco_hydro_6 [M=311]	0	2	1	depleted	1
DUF4862 [M=291]	0	2	1	depleted	1
DUF5685 [M=273]	0	2	1	depleted	1
HKR_ArcB_TM [M=75]	0	2	1	depleted	1
HP0268 [M=80]	0	2	1	depleted	1
DUF5660 [M=109]	0	2	1	depleted	1
Herpes_glycoH_C [M=135]	0	2	1	depleted	1
DUF4891 [M=92]	0	2	1	depleted	1
DUF5772 [M=84]	0	2	1	depleted	1
IFT46_B_C [M=212]	0	2	1	depleted	1
DUF4992 [M=182]	0	2	1	depleted	1
DUF5082 [M=123]	0	2	1	depleted	1
DUF5067 [M=126]	0	2	1	depleted	1
HofP [M=132]	0	2	1	depleted	1
DUF5057 [M=359]	0	2	1	depleted	1
DUF5048 [M=104]	0	2	1	depleted	1
HrpB7 [M=157]	0	2	1	depleted	1
DUF4985 [M=114]	0	2	1	depleted	1
DUF5028 [M=166]	0	2	1	depleted	1
Hva1_TUDOR [M=59]	0	2	1	depleted	1
DUF5007 [M=287]	0	2	1	depleted	1
DUF5005 [M=436]	0	2	1	depleted	1
DUF4996 [M=102]	0	2	1	depleted	1
IDEAL [M=37]	0	2	1	depleted	1
IDO [M=437]	0	2	1	depleted	1
DUF5017 [M=182]	0	2	1	depleted	1
DUF4767 [M=139]	0	1	1	depleted	1
HlyC [M=128]	0	2	1	depleted	1
DUF4929 [M=366]	0	2	1	depleted	1
Glucodextran_N [M=263]	0	2	1	depleted	1
ECR1_N [M=38]	0	2	1	depleted	1
EHN [M=108]	0	2	1	depleted	1
EipA [M=160]	0	2	1	depleted	1
Elf1 [M=78]	0	2	1	depleted	1
End_beta_propel [M=367]	0	2	1	depleted	1
DUF5691 [M=210]	0	2	1	depleted	1
Endonuc-HincII [M=247]	0	2	1	depleted	1
EGF_2 [M=32]	0	2	1	depleted	1
DUF1104 [M=92]	0	2	1	depleted	1
EntA_Immun [M=73]	0	2	1	depleted	1
DUF1093 [M=80]	0	2	1	depleted	1
ErmC [M=31]	0	2	1	depleted	1
DUF1146 [M=48]	0	2	1	depleted	1
EGF_3 [M=36]	0	2	1	depleted	1
DUF4931 [M=245]	0	2	1	depleted	1
Cnn_1N [M=73]	0	2	1	depleted	1
DUF4878 [M=112]	0	2	1	depleted	1
Importin_rep_4 [M=90]	0	2	1	depleted	1
DUF4928 [M=306]	0	2	1	depleted	1
Init_tRNA_PT [M=110]	0	2	1	depleted	1
Ins134_P3_kin [M=201]	0	2	1	depleted	1
DUF4925 [M=339]	0	2	1	depleted	1
Integrin_beta [M=248]	0	2	1	depleted	1
CoatB [M=46]	0	2	1	depleted	1
DUF4902 [M=118]	0	2	1	depleted	1
IrmA [M=106]	0	2	1	depleted	1
DUF4885 [M=325]	0	2	1	depleted	1
JmjN [M=34]	0	2	1	depleted	1
DUF4879 [M=124]	0	2	1	depleted	1
KAP [M=708]	0	2	1	depleted	1
KDGP_aldolase [M=218]	0	2	1	depleted	1
DUF4943 [M=150]	0	2	1	depleted	1
FliG_C [M=108]	0	43	1	depleted	1
DUF4777 [M=66]	0	1	1	depleted	1
DUF3114 [M=253]	0	1	1	depleted	1
CRISPR_Cas2 [M=74]	0	30	1	depleted	1
Memo [M=271]	0	30	1	depleted	1
OprB [M=378]	0	30	1	depleted	1
ubiquitin [M=72]	0	32	1	depleted	1
DUF2249 [M=70]	0	32	1	depleted	1
TraN [M=241]	0	35	1	depleted	1
DUF5684 [M=79]	0	34	1	depleted	1
ChapFlgA [M=122]	0	34	1	depleted	1
Cytochrom_C1 [M=219]	0	34	1	depleted	1
MBOAT_2 [M=83]	0	34	1	depleted	1
Peptidase_M61 [M=118]	0	34	1	depleted	1
DUF1365 [M=240]	0	34	1	depleted	1
PglD_N [M=78]	0	34	1	depleted	1
Rep_1 [M=250]	0	34	1	depleted	1
Myb_DNA-bind_6 [M=60]	0	34	1	depleted	1
AntA [M=68]	0	34	1	depleted	1
Rib_5-P_isom_A [M=173]	0	34	1	depleted	1
DUF3857 [M=167]	0	33	1	depleted	1
DUF2177 [M=124]	0	33	1	depleted	1
Dabb [M=97]	0	33	1	depleted	1
UQ_con [M=140]	0	33	1	depleted	1
DUF2726 [M=127]	0	34	1	depleted	1
DUF3078 [M=91]	0	34	1	depleted	1
DUF2817 [M=340]	0	30	1	depleted	1
FGase [M=216]	0	34	1	depleted	1
DUF2400 [M=227]	0	34	1	depleted	1
Glyco_hydro_28 [M=325]	0	34	1	depleted	1
FlaE [M=123]	0	34	1	depleted	1
Cytochrome_C554 [M=84]	0	34	1	depleted	1
DUF5758 [M=105]	0	34	1	depleted	1
VirB8 [M=214]	0	34	1	depleted	1
Peptidase_C70 [M=143]	0	34	1	depleted	1
Met_gamma_lyase [M=405]	0	30	1	depleted	1
HMG-CoA_red [M=367]	0	30	1	depleted	1
Abi_2 [M=179]	0	30	1	depleted	1
CBM9_1 [M=185]	0	30	1	depleted	1
DUF2238 [M=140]	0	30	1	depleted	1
MASE1 [M=300]	0	30	1	depleted	1
EarP [M=373]	0	30	1	depleted	1
DUF475 [M=295]	0	29	1	depleted	1
LrgB [M=214]	0	29	1	depleted	1
SprA_N [M=506]	0	30	1	depleted	1
PRiA4_ORF3 [M=174]	0	29	1	depleted	1
Alk_phosphatase [M=418]	0	29	1	depleted	1
DUF1428 [M=101]	0	29	1	depleted	1
LprI [M=97]	0	29	1	depleted	1
IgGFc_binding [M=294]	0	29	1	depleted	1
PTS_EIIA_1 [M=127]	0	29	1	depleted	1
HicB_lk_antitox [M=123]	0	29	1	depleted	1
Barstar [M=79]	0	29	1	depleted	1
EcoR124_C [M=259]	0	33	1	depleted	1
LCAT [M=392]	0	30	1	depleted	1
OstA_2 [M=158]	0	30	1	depleted	1
DUF3340 [M=153]	0	30	1	depleted	1
Nucleos_tra2_C [M=209]	0	30	1	depleted	1
SH3_16 [M=48]	0	30	1	depleted	1
SHNi-TPR [M=38]	0	30	1	depleted	1
DUF4968 [M=94]	0	30	1	depleted	1
DUF2975 [M=131]	0	30	1	depleted	1
PAS_11 [M=113]	0	30	1	depleted	1
NAD_binding_6 [M=156]	0	30	1	depleted	1
Na_H_antiporter [M=303]	0	30	1	depleted	1
DUF3109 [M=181]	0	30	1	depleted	1
DUF302 [M=63]	0	30	1	depleted	1
SMODS [M=164]	0	30	1	depleted	1
Pur_DNA_glyco [M=183]	0	30	1	depleted	1
UPF0547 [M=26]	0	30	1	depleted	1
Na_Pi_cotrans [M=137]	0	30	1	depleted	1
NA37 [M=309]	0	29	1	depleted	1
Glyco_transf_20 [M=474]	0	34	1	depleted	1
Phenol_Hydrox [M=230]	0	33	1	depleted	1
Cupin_7 [M=91]	0	32	1	depleted	1
DNA_pol3_chi [M=137]	0	32	1	depleted	1
VitK2_biosynth [M=266]	0	32	1	depleted	1
Type_ISP_C [M=343]	0	32	1	depleted	1
AMP-binding_C_2 [M=96]	0	32	1	depleted	1
DUF4292 [M=210]	0	32	1	depleted	1
DUF4468 [M=92]	0	32	1	depleted	1
DUF485 [M=89]	0	32	1	depleted	1
ADSL_C [M=77]	0	32	1	depleted	1
Trp_repressor [M=88]	0	32	1	depleted	1
GSIII_N [M=160]	0	32	1	depleted	1
GBBH-like_N [M=85]	0	32	1	depleted	1
Ub-RnfH [M=83]	0	32	1	depleted	1
DUF885 [M=529]	0	32	1	depleted	1
Hydant_A_N [M=178]	0	32	1	depleted	1
RPN7 [M=174]	0	32	1	depleted	1
PagL [M=134]	0	32	1	depleted	1
Cyclin_N [M=127]	0	33	1	depleted	1
DUF4258 [M=63]	0	33	1	depleted	1
Trm112p [M=68]	0	33	1	depleted	1
Minor_tail_Z [M=190]	0	33	1	depleted	1
DUF1211 [M=88]	0	33	1	depleted	1
TcdB_toxin_midN [M=181]	0	33	1	depleted	1
DUF493 [M=84]	0	32	1	depleted	1
DUF4160 [M=65]	0	33	1	depleted	1
GntP_permease [M=440]	0	33	1	depleted	1
LPD22 [M=98]	0	33	1	depleted	1
Pyridox_ox_2 [M=142]	0	33	1	depleted	1
TilS_C [M=74]	0	33	1	depleted	1
RsgA_N [M=54]	0	32	1	depleted	1
HemY_N [M=107]	0	32	1	depleted	1
GCS2 [M=291]	0	33	1	depleted	1
DUF5666 [M=61]	0	32	1	depleted	1
DUF4376 [M=102]	0	32	1	depleted	1
DNA_pol_B_thumb [M=69]	0	32	1	depleted	1
DUF3883 [M=92]	0	35	1	depleted	1
UPF0227 [M=187]	0	35	1	depleted	1
HigB-like_toxin [M=93]	0	35	1	depleted	1
PDDEXK_5 [M=137]	0	35	1	depleted	1
KAP_NTPase [M=326]	0	35	1	depleted	1
Peptidase_M90 [M=245]	0	35	1	depleted	1
AIM24 [M=202]	0	35	1	depleted	1
IspA [M=176]	0	35	1	depleted	1
DUF1289 [M=48]	0	35	1	depleted	1
DUF4065 [M=114]	0	35	1	depleted	1
PRD [M=90]	0	35	1	depleted	1
FSH1 [M=212]	0	35	1	depleted	1
TSP_NTD [M=189]	0	35	1	depleted	1
Phage_holin_3_6 [M=113]	0	34	1	depleted	1
FMN_bind_2 [M=168]	0	35	1	depleted	1
IMS_HHH [M=32]	0	34	1	depleted	1
Cyt-b5 [M=74]	0	35	1	depleted	1
2OG-FeII_Oxy_4 [M=93]	0	34	1	depleted	1
[truncated: 7,274 more rows]
