# Supplementary material for: A genome-phenome association study in native microbiomes identifies a mechanism for cytosine modification in DNA and RNA
Source: eLife journal article supplement (doi:10.7554/elife.70021), 2021-11-08
Supplement: supp [file Source data list.docx]

**Source data list**

**Fasta files of modified and unmodified contigs as defined in Figure 3c:**

Figure_3_source_data_1_modified_contigs.fa

**Enrichment score of contigs as plotted in Figure 3c-d:**

Figure_3_source_data_3_enrichment_scores.csv

**Raw and labeled gel pictures shown in supplement Figure 5b:**

Figure_supplement_5_source_data_1_labeled_gel.png

Figure_supplement_5_source_data_1_gel.tif

Figure_supplement_5_source_data_2_labeled_gel.png

Figure_supplement_5_source_data_2_gel.tif
