# Supplementary figures and images for: A genome-phenome association study in native microbiomes identifies a mechanism for cytosine modification in DNA and RNA
Source: eLife journal article supplement (doi:10.7554/elife.70021), 2021-11-08

Figure 1 - figure supplement 1

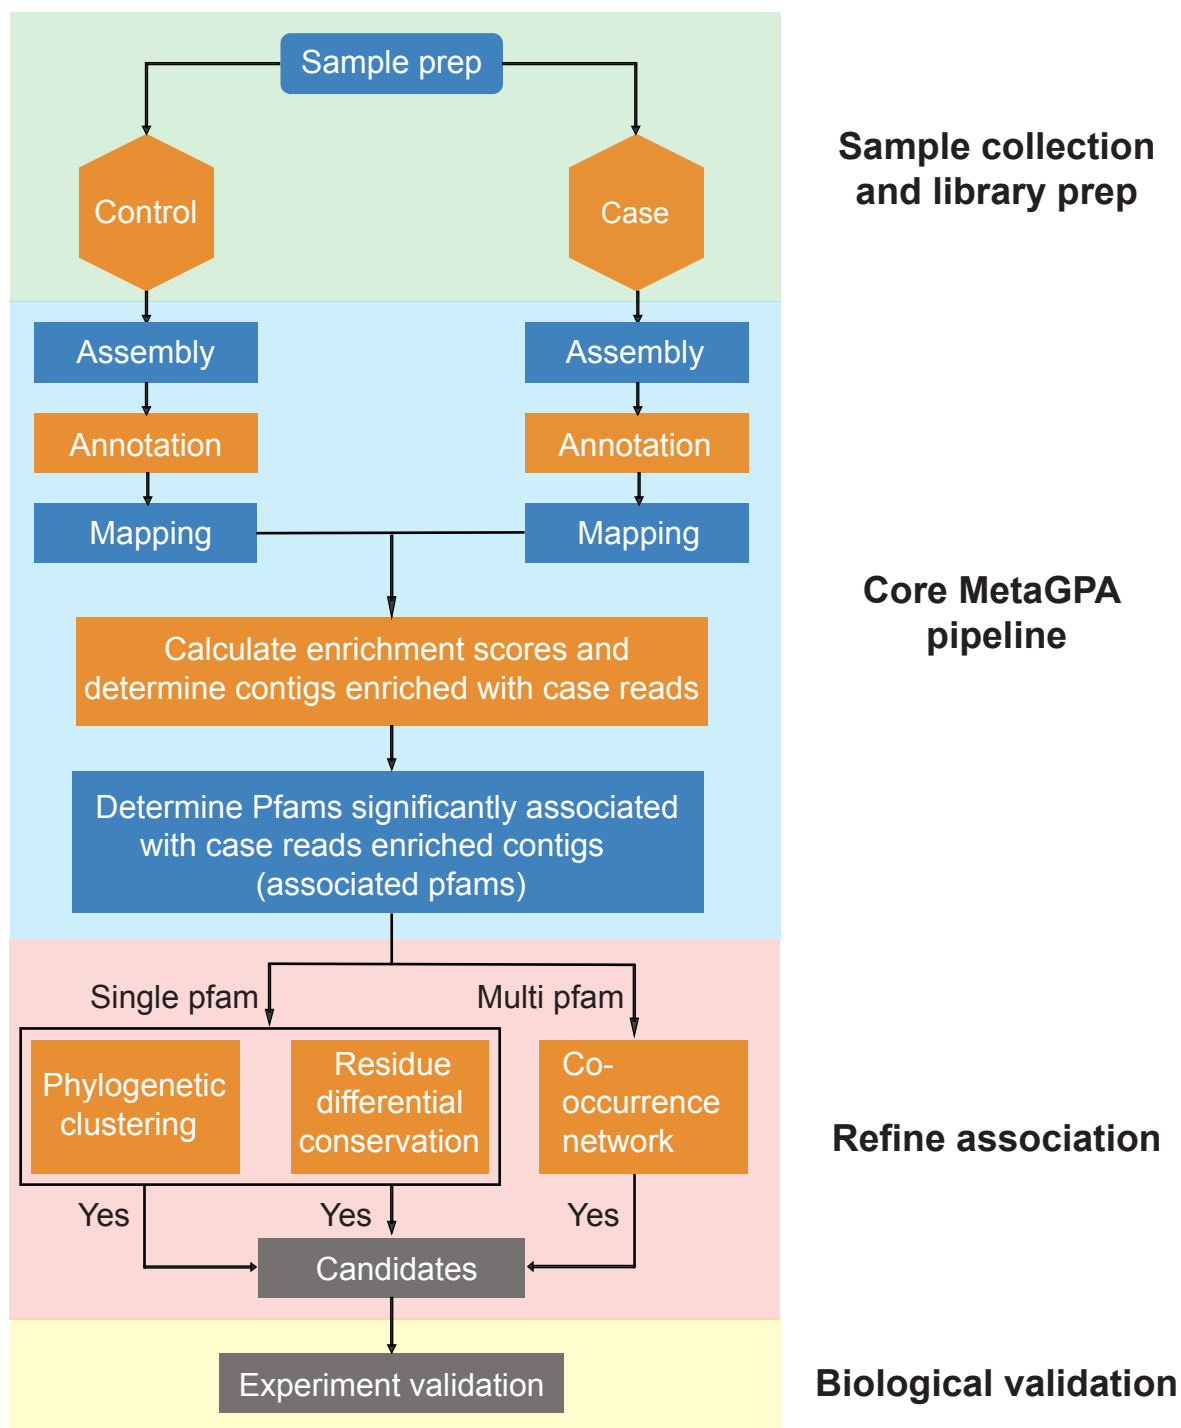

Supplement: supp [file elife-70021-supp-v1.zip › elife_poa_e70021_Figure_1_figure_supplement_1.pdf]

# Figure 4 - figure supplement 1

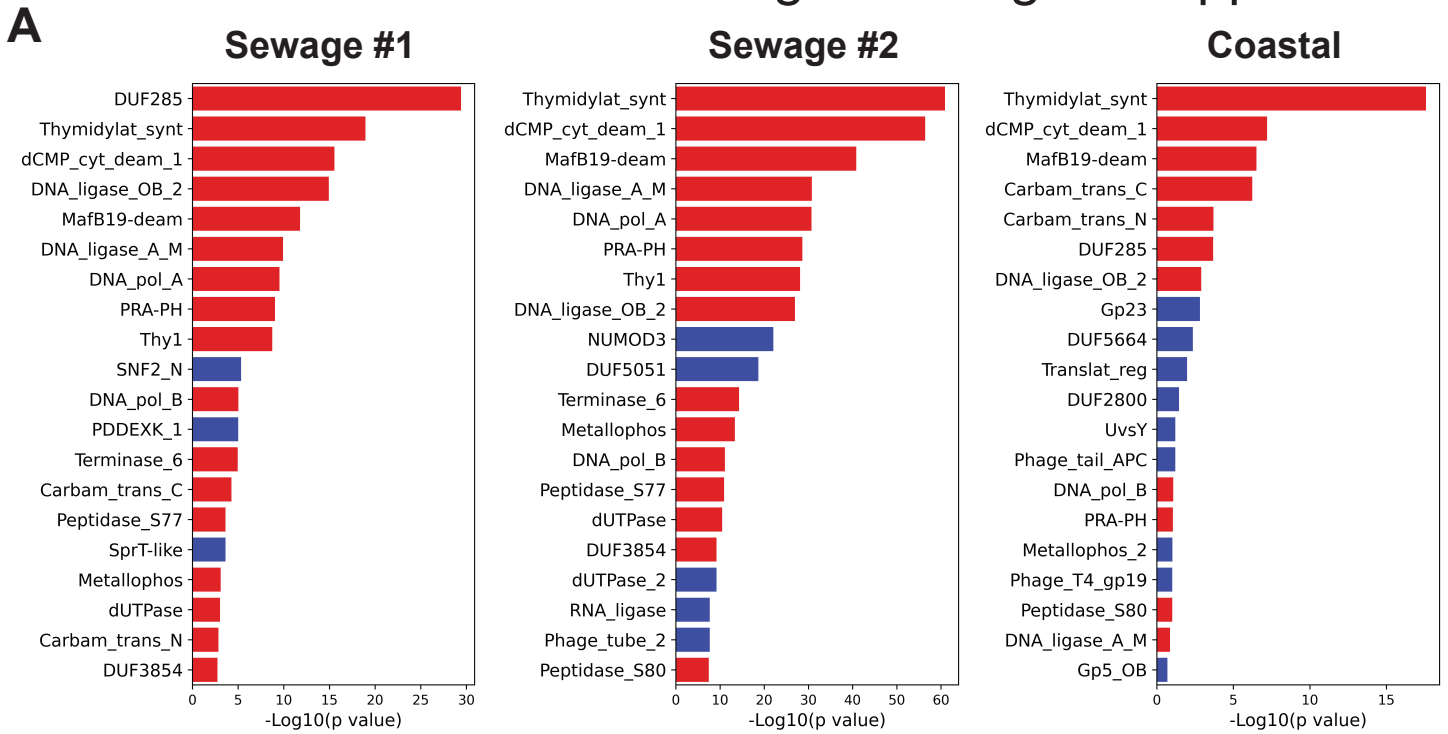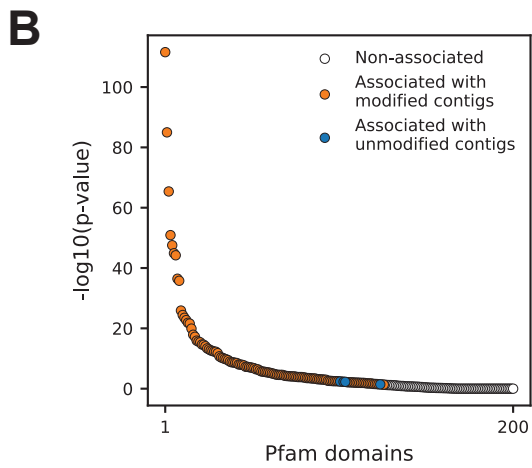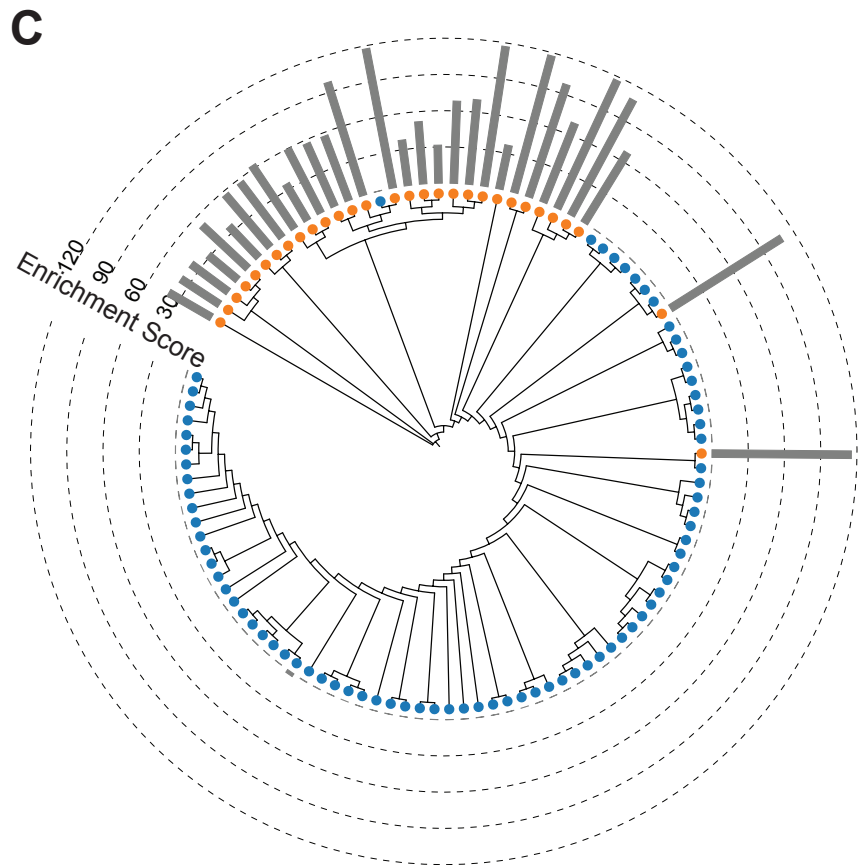

Supplement: supp [file elife-70021-supp-v1.zip › elife_poa_e70021_Figure_4_figure_supplement_1.pdf]

Figure 5 - figure supplement 1

**A**

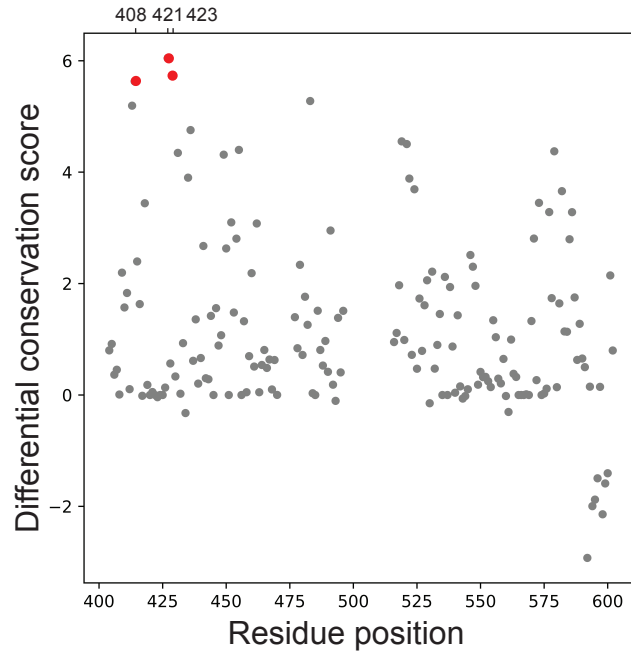

**B**

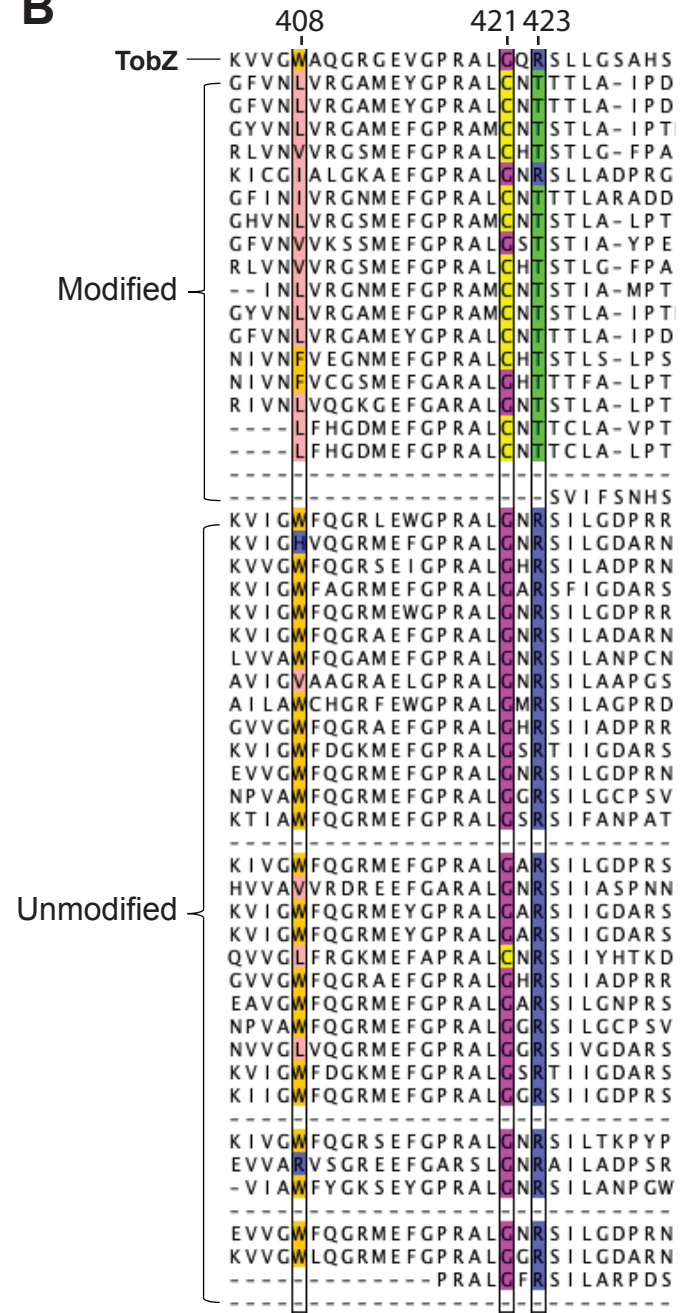

**C**

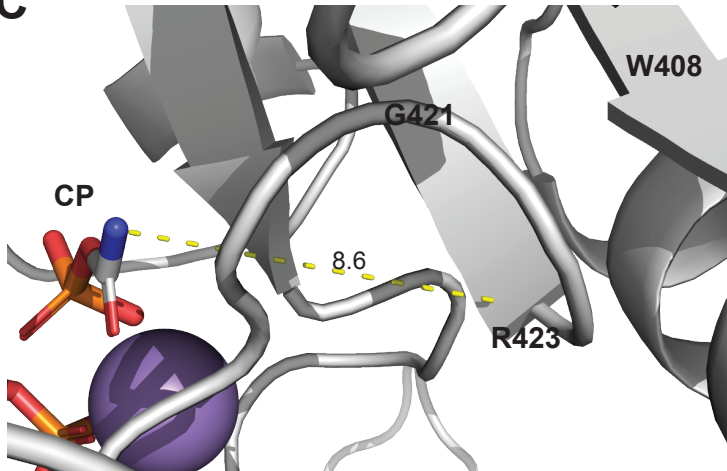

Supplement: supp [file elife-70021-supp-v1.zip › elife_poa_e70021_Figure_5_figure_supplement_1.pdf]

Figure 6 - figure supplement 1

**A**

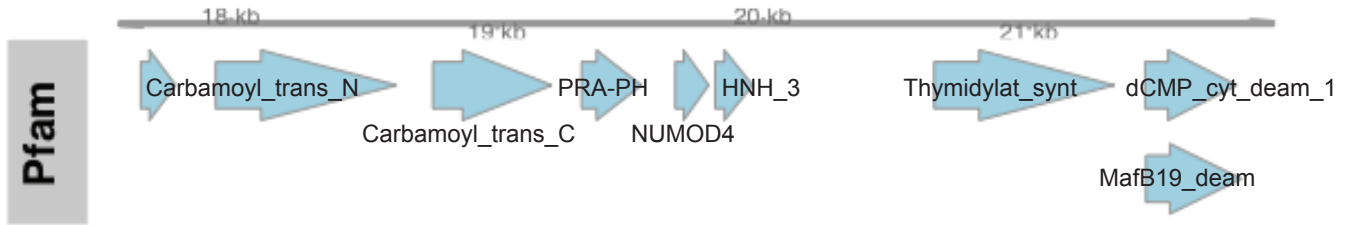

**B**

### Purification with HisTrap column

### Purification with Q column

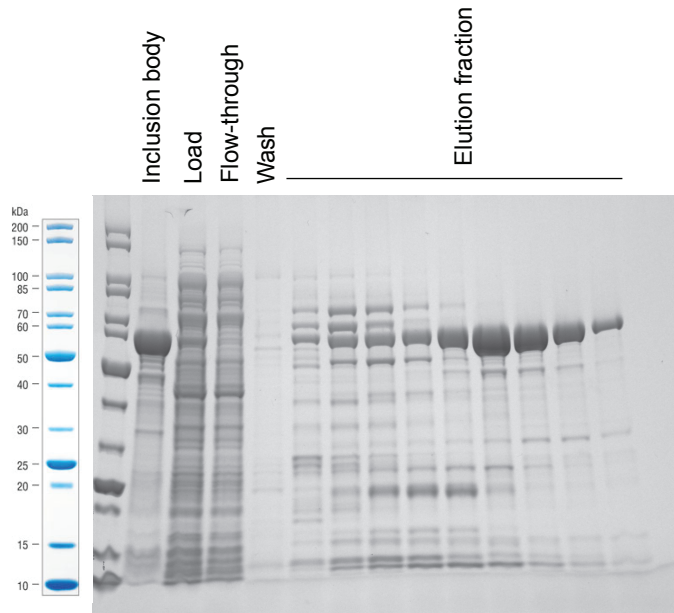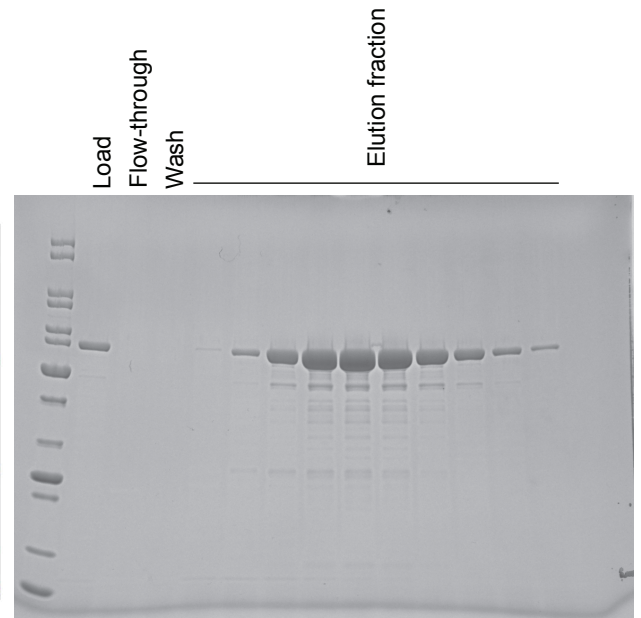

**C**

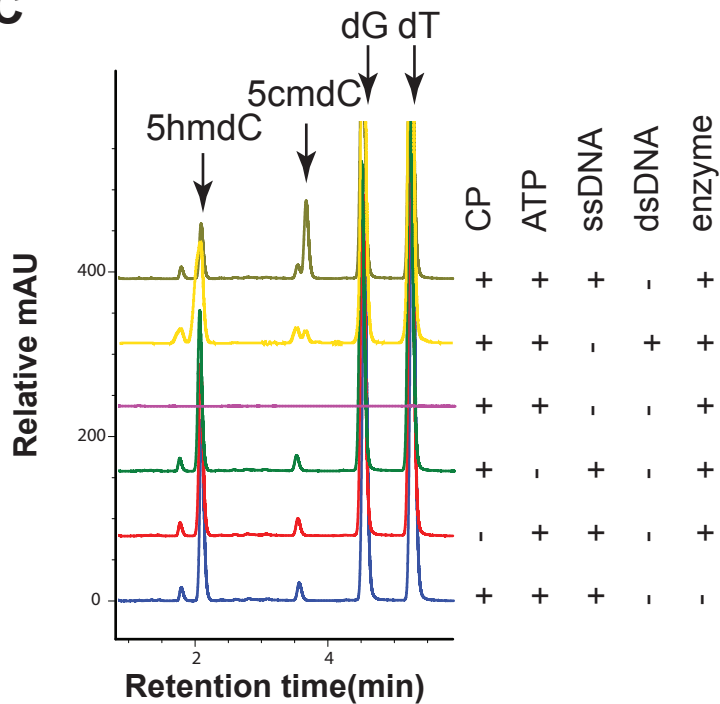

**D**

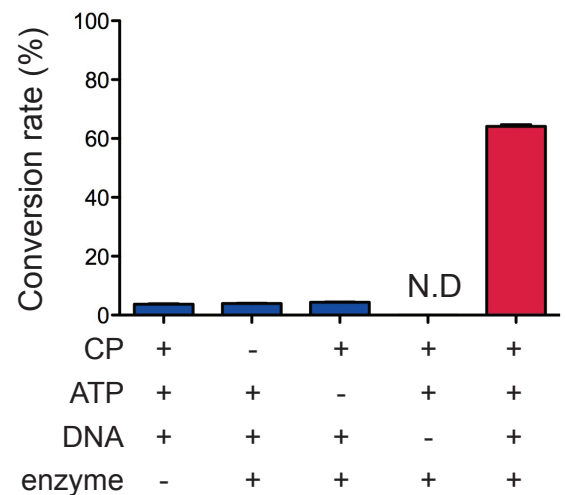

Supplement: supp [file elife-70021-supp-v1.zip › elife_poa_e70021_Figure_6_figure_supplement_1.pdf]

Figure 6 - figure supplement 2

A

5hmdC

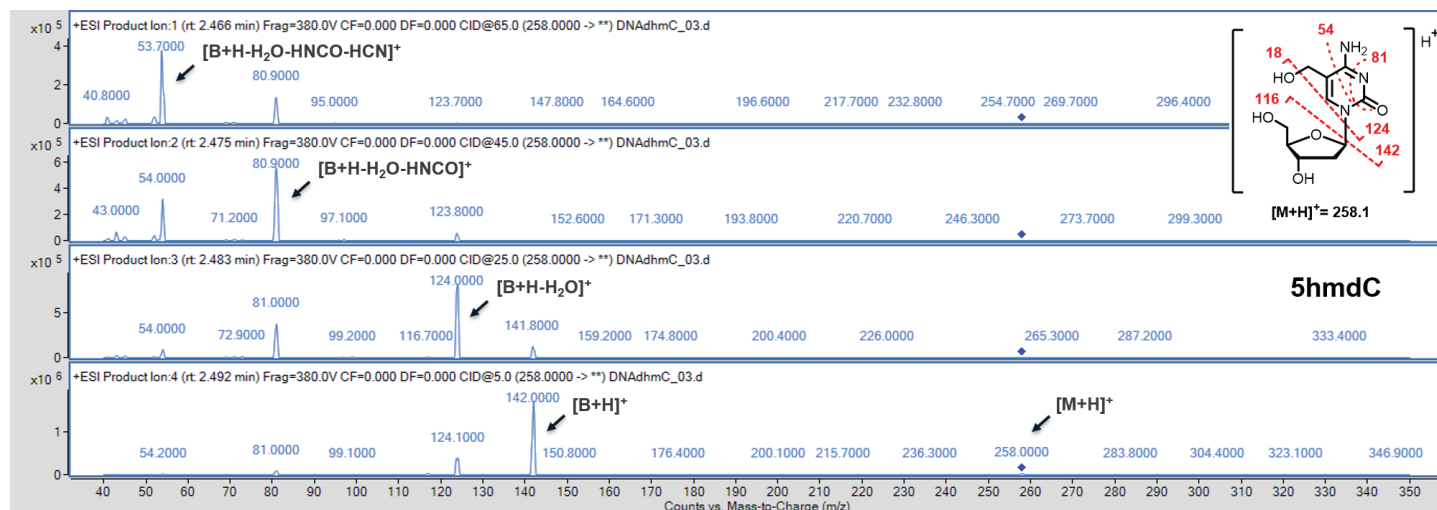

B

5cmdC

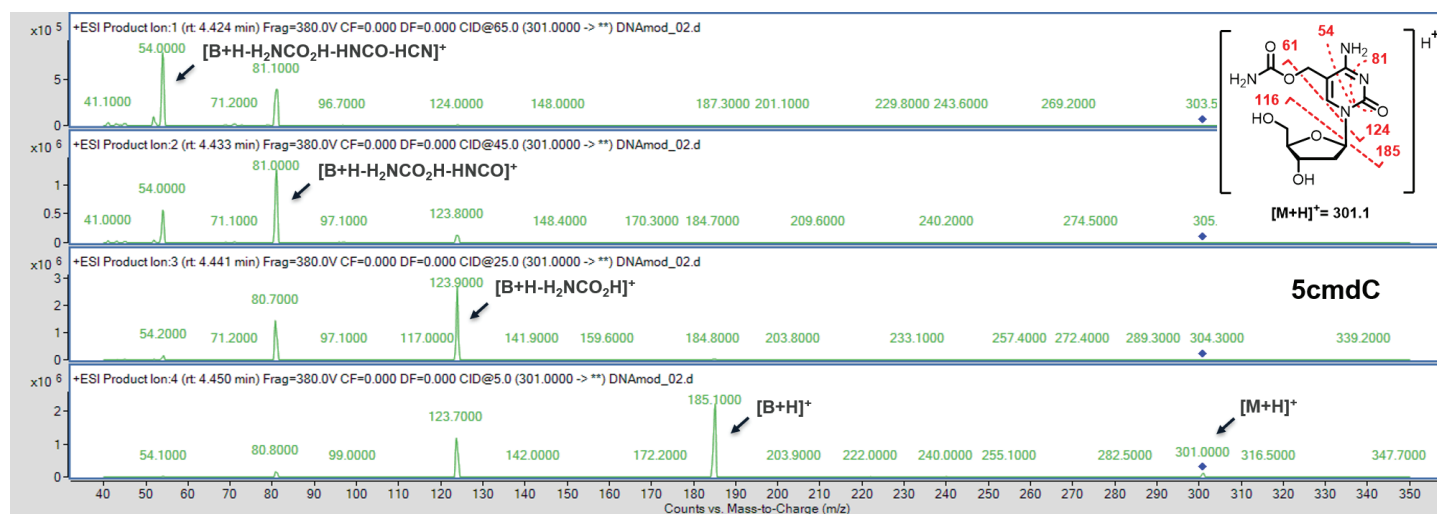

Supplement: supp [file elife-70021-supp-v1.zip › elife_poa_e70021_Figure_6=figure_supplement_2.pdf]

Figure 6 - figure supplement 3

**A**

### Nucleoside Triphosphate

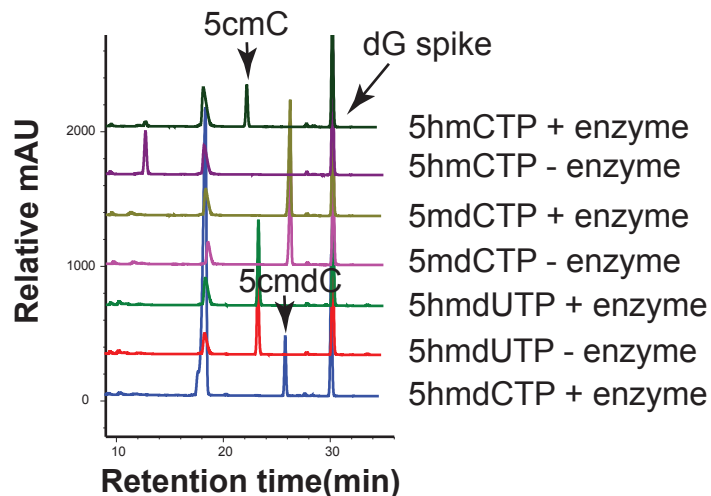

**B**

### 5hmC RNA

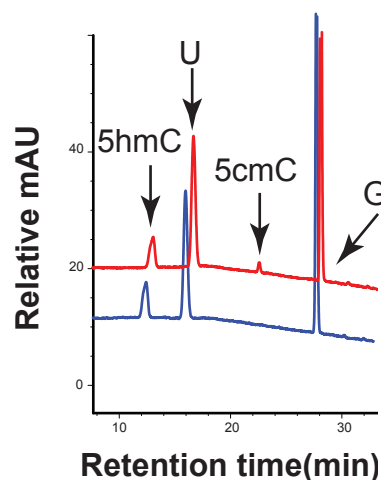

**C**

### 5hmC

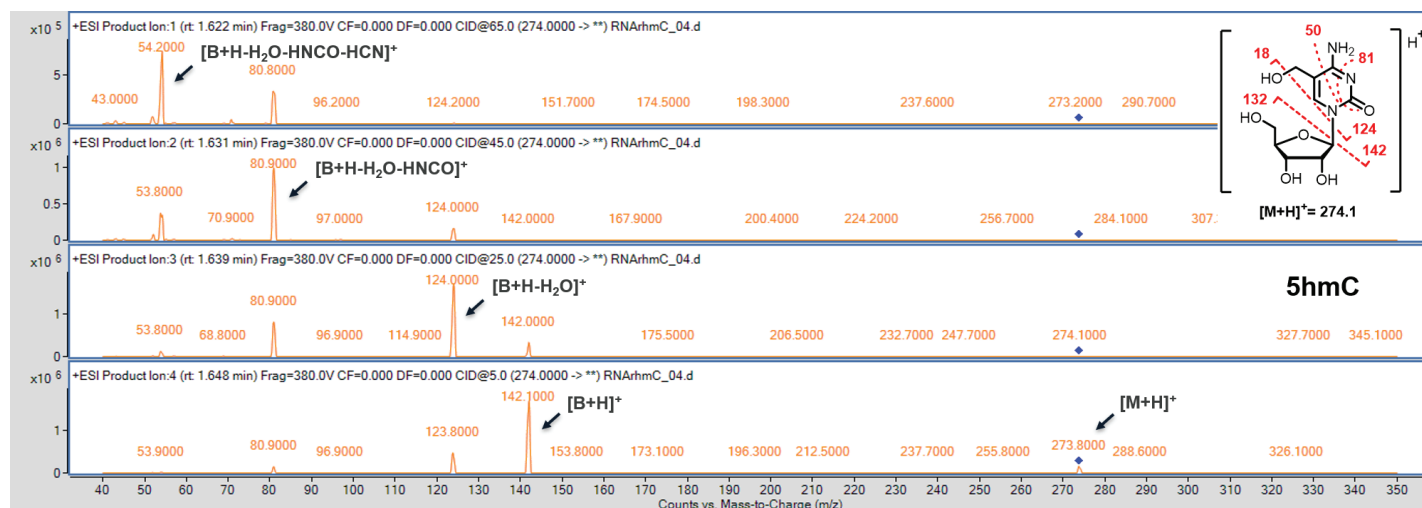

### 5cmC

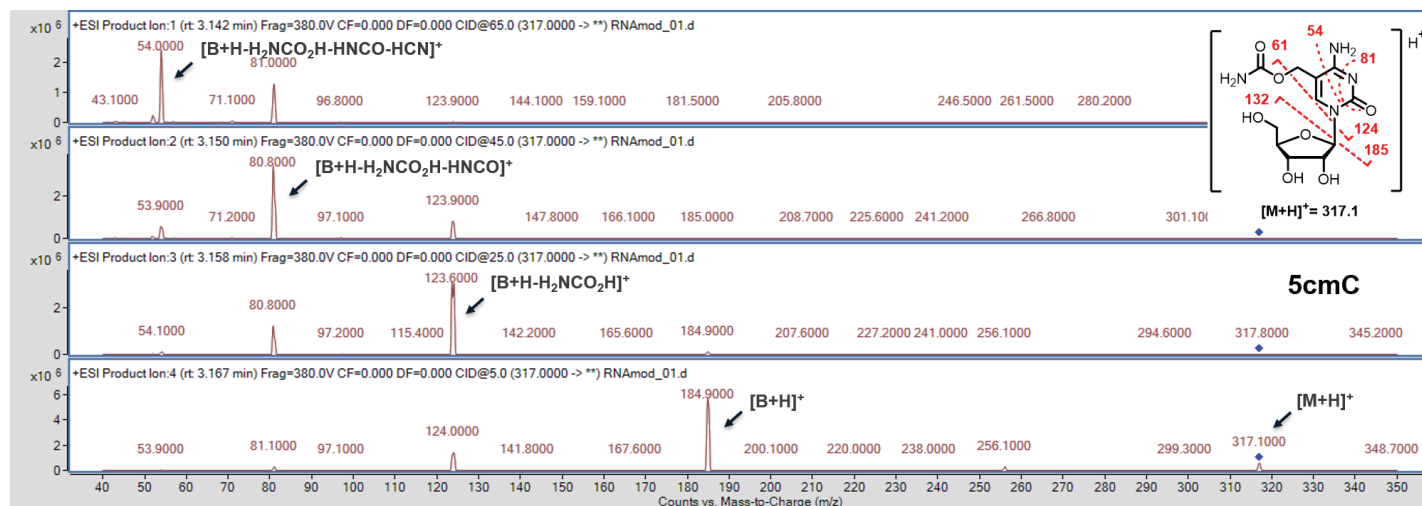

Supplement: supp [file elife-70021-supp-v1.zip › elife_poa_e70021_Figure_6_figure_supplement_3.pdf]
